# Supplementary material for: Mechanistic insight into the selective olefin-directed oxidative carbocyclization and borylation by a palladium catalyst: a theoretical study
Source: Royal Society of Chemistry journal article supplement (doi:10.1039/c6ra27752g), 2017-01-01
Supplement: c6ra27752g1.pdf [file c6ra27752g1.pdf]

*Supporting Information*

**Mechanistic insight into the selective olefin-directed oxidative carbocyclization and borylation via palladium catalyst: a theoretical study**

**Xiao-Wen Zheng<sup>a</sup>, Ling Nie<sup>a</sup>, Ya-Ping Li<sup>b</sup>, Shao-Jing Liu<sup>b</sup>, Feng-Yue Zhao<sup>b</sup>, Xin-Yu Zhang<sup>a</sup>, Xing-Dong Wang<sup>a</sup> and Tao Liu<sup>a,b,\*</sup>**

<sup>a</sup> *Department of Chemistry and Chemical Engineering, Jining University, Qufu 273155, Shandong, China*

<sup>b</sup> *School of Chemistry and Chemical Engineering, Qufu Normal University, Qufu 273165, Shandong, China*

---

\* Corresponding author.  
E-mail address: liutao\_2005@126.com

## Cartesian coordinates in MeOH and energies for all of the calculated structures in the two solvents

|                                                                                    |             |             |             |                                                                                     |             |             |             |
|------------------------------------------------------------------------------------|-------------|-------------|-------------|-------------------------------------------------------------------------------------|-------------|-------------|-------------|
| <b>R1</b>                                                                          |             |             |             | H                                                                                   | 2.24454100  | -1.43563800 | 2.20152100  |
| Thermal correction to Enthalpy in MeOH at B3LYP/BSI level=0.29168                  |             |             |             | C                                                                                   | 3.63992500  | -1.93661800 | -0.98482500 |
| Thermal correction to Gibbs Free Energy in MeOH at B3LYP/BSI level=0.227394        |             |             |             | H                                                                                   | 4.67412800  | -1.63971400 | -0.76674700 |
| Sum of electronic and thermal Enthalpies in MeOH at B3LYP/BSI level=-618.24556     |             |             |             | H                                                                                   | 3.62230100  | -3.03434000 | -0.99805900 |
| Sum of electronic and thermal Free Energies in MeOH at B3LYP/BSI level=-618.309846 |             |             |             | H                                                                                   | 3.38090000  | -1.57599500 | -1.98358300 |
| Sum of electronic Energies in MeOH at M06/BSII level =-618.2439385                 |             |             |             | <b>cat</b>                                                                          |             |             |             |
| Thermal correction to Enthalpy in AcOH at B3LYP/BSI level=0.291962                 |             |             |             | Thermal correction to Enthalpy in MeOH at B3LYP/BSI level=0.114099                  |             |             |             |
| Thermal correction to Gibbs Free Energy in AcOH at B3LYP/BSI level=0.227768        |             |             |             | Thermal correction to Gibbs Free Energy in MeOH at B3LYP/BSI level=0.063708         |             |             |             |
| Sum of electronic and thermal Enthalpies in AcOH at B3LYP/BSI level=-618.237493    |             |             |             | Sum of electronic and thermal Enthalpies in MeOH at B3LYP/BSI level=-583.637304     |             |             |             |
| Sum of electronic and thermal Free Energies in AcOH at B3LYP/BSI level=-618.301686 |             |             |             | Sum of electronic and thermal Free Energies in MeOH at B3LYP/BSI level=-583.687694  |             |             |             |
| Sum of electronic Energies in AcOH at M06/BSII level =-618.2355726                 |             |             |             | Sum of electronic Energies in MeOH at M06/BSII level =-584.780709                   |             |             |             |
| C                                                                                  | 1.70367400  | -0.59716400 | -0.22041800 | Thermal correction to Enthalpy in AcOH at B3LYP/BSI level=0.114246                  |             |             |             |
| C                                                                                  | 2.69793600  | -1.40339900 | 0.07467900  | Thermal correction to Gibbs Free Energy in AcOH at B3LYP/BSI level=0.064052         |             |             |             |
| C                                                                                  | 0.70026900  | 0.19471200  | -0.52558000 | Sum of electronic and thermal Enthalpies in AcOH at B3LYP/BSI level=-583.626137     |             |             |             |
| C                                                                                  | -0.65687000 | -0.37632400 | -0.89459500 | Sum of electronic and thermal Free Energies in AcOH at B3LYP/BSI level=-583.676331  |             |             |             |
| H                                                                                  | -0.99976400 | 0.01774100  | -1.85916700 | Sum of electronic Energies in AcOH at M06/BSII level =-584.7692953                  |             |             |             |
| H                                                                                  | -0.60104000 | -1.46558800 | -1.00436000 | Pd                                                                                  | 0.00000000  | 0.00002600  | -0.00348100 |
| C                                                                                  | -1.73948500 | -0.10011100 | 0.13444000  | O                                                                                   | -1.77728900 | -1.08724600 | -0.00953100 |
| O                                                                                  | -1.54880300 | 0.22705800  | 1.29481200  | O                                                                                   | 1.77726400  | -1.08726100 | -0.00955500 |
| O                                                                                  | -2.95919900 | -0.29742100 | -0.38743200 | C                                                                                   | -2.45862700 | 0.00008800  | -0.00875100 |
| C                                                                                  | -4.09746700 | -0.13931100 | 0.50749400  | O                                                                                   | -1.77722300 | 1.08732400  | -0.00957100 |
| C                                                                                  | -5.34510500 | -0.43112400 | -0.29809300 | C                                                                                   | 2.45862700  | 0.00004900  | -0.00875400 |
| H                                                                                  | -4.09241000 | 0.88254500  | 0.89829000  | O                                                                                   | 1.77724800  | 1.08730800  | -0.00950700 |
| H                                                                                  | -3.97913300 | -0.83160700 | 1.34630100  | C                                                                                   | -3.94612200 | -0.00001200 | 0.02320800  |
| H                                                                                  | -6.22619900 | -0.31439000 | 0.34097400  | H                                                                                   | -4.33342800 | 0.90364900  | -0.45216300 |
| H                                                                                  | -5.44031200 | 0.26004200  | -1.14150300 | H                                                                                   | -4.33336300 | -0.89353600 | -0.47117100 |
| H                                                                                  | -5.33436600 | -1.45562900 | -0.68341600 | H                                                                                   | -4.27385600 | -0.01163000 | 1.06938600  |
| C                                                                                  | 0.81240000  | 1.71680400  | -0.54936700 | C                                                                                   | 3.94612300  | -0.00004300 | 0.02319500  |
| H                                                                                  | 0.15630100  | 2.13649300  | 0.22460800  | H                                                                                   | 4.33341700  | 0.90212200  | -0.45504600 |
| H                                                                                  | 0.40302800  | 2.06165100  | -1.51226600 | H                                                                                   | 4.27386000  | -0.00816900 | 1.06940400  |
| C                                                                                  | 2.20866200  | 2.24902400  | -0.38580600 | H                                                                                   | 4.33335700  | -0.89511400 | -0.46835600 |
| C                                                                                  | 2.59126300  | 3.10787200  | 0.56048500  | <b>1</b>                                                                            |             |             |             |
| H                                                                                  | 2.93880200  | 1.89952300  | -1.11650800 | Thermal correction to Enthalpy in MeOH at B3LYP/BSI level=0.4081                    |             |             |             |
| H                                                                                  | 3.61362600  | 3.47394600  | 0.61788600  | Thermal correction to Gibbs Free Energy in MeOH at B3LYP/BSI level=0.316527         |             |             |             |
| H                                                                                  | 1.89626500  | 3.48075600  | 1.31091800  | Sum of electronic and thermal Enthalpies in MeOH at B3LYP/BSI level=-1201.901052    |             |             |             |
| C                                                                                  | 2.96823600  | -1.85169900 | 1.49596600  | Sum of electronic and thermal Free Energies in MeOH at B3LYP/BSI level=-1201.992625 |             |             |             |
| H                                                                                  | 2.93243100  | -2.94659300 | 1.56750600  | Sum of electronic Energies in MeOH at M06/BSII level =-1203.0775129                 |             |             |             |
| H                                                                                  | 3.97429200  | -1.54627400 | 1.81227900  | Thermal correction to Enthalpy in AcOH at B3LYP/BSI level=0.408751                  |             |             |             |

Thermal correction to Gibbs Free Energy in AcOH at B3LYP/BSI level=0.318045

Sum of electronic and thermal Enthalpies in AcOH at B3LYP/BSI level=-1201.877907

Sum of electronic and thermal Free Energies in AcOH at B3LYP/BSI level=-1201.968614

Sum of electronic Energies in AcOH at M06/BSII level =-1203.0619842

|    |             |             |             |
|----|-------------|-------------|-------------|
| C  | -0.75146200 | 0.60015900  | 0.45310700  |
| C  | -0.29822600 | 1.86024100  | 0.21642500  |
| C  | -1.64683600 | -0.32695900 | 0.75231300  |
| C  | -3.05835300 | 0.04422100  | 1.14545700  |
| H  | -3.36917500 | -0.50743700 | 2.04159700  |
| H  | -3.13640900 | 1.10851500  | 1.38962600  |
| C  | -4.06047400 | -0.25000400 | 0.04136500  |
| O  | -3.77553400 | -0.62862900 | -1.08374200 |
| O  | -5.31178200 | -0.02223800 | 0.45517000  |
| C  | -6.37702900 | -0.21764700 | -0.52205600 |
| C  | -7.66594400 | 0.26103900  | 0.10992200  |
| H  | -6.41538200 | -1.28059600 | -0.77850900 |
| H  | -6.12825300 | 0.34777900  | -1.42417700 |
| H  | -8.48816200 | 0.12115900  | -0.59928800 |
| H  | -7.89820500 | -0.30441400 | 1.01783000  |
| H  | -7.60953100 | 1.32451500  | 0.36301200  |
| C  | -1.26735800 | -1.78873300 | 0.69340900  |
| H  | -2.12262000 | -2.39660600 | 0.36840800  |
| H  | -1.00621600 | -2.14448200 | 1.69741600  |
| C  | -0.11494300 | -2.02940300 | -0.25588500 |
| C  | -0.02561500 | -1.45471100 | -1.50938300 |
| H  | 0.56280300  | -2.84354000 | -0.01194900 |
| H  | 0.70653700  | -1.81942300 | -2.22305500 |
| H  | -0.81379400 | -0.81424700 | -1.89310900 |
| C  | -0.42822800 | 2.49902900  | -1.14105800 |
| H  | -1.16610200 | 3.30882200  | -1.05648700 |
| H  | 0.51638900  | 2.95393600  | -1.45270600 |
| H  | -0.76575900 | 1.79440800  | -1.90214100 |
| C  | 0.19990600  | 2.73005700  | 1.33556100  |
| H  | 1.07012200  | 3.31936800  | 1.03774900  |
| H  | -0.61187400 | 3.43624500  | 1.56278300  |
| H  | 0.42519100  | 2.16315400  | 2.23930400  |
| Pd | 1.22433000  | -0.19909000 | -0.15969600 |
| O  | 4.50922300  | -2.72441400 | -0.25865700 |
| O  | 3.09653200  | 1.73192500  | -1.48358200 |
| C  | 3.56419600  | -2.04310300 | 0.16008400  |
| O  | 2.80955300  | -1.38801800 | -0.68908800 |
| C  | 3.30890500  | 1.78397000  | -0.26059900 |
| O  | 2.60383300  | 1.16052900  | 0.63723500  |
| C  | 3.25960700  | -1.94797900 | 1.64043200  |

|   |            |             |             |
|---|------------|-------------|-------------|
| H | 2.23872300 | -2.28736200 | 1.84438600  |
| H | 3.96479400 | -2.55961500 | 2.20603700  |
| H | 3.33260100 | -0.90672600 | 1.96766800  |
| C | 4.46897400 | 2.58285900  | 0.30546600  |
| H | 4.18437200 | 3.09453600  | 1.22842200  |
| H | 5.28587700 | 1.89270200  | 0.54682200  |
| H | 4.82756900 | 3.30600900  | -0.42966400 |

### TS1

Thermal correction to Enthalpy in MeOH at B3LYP/BSI level=0.402379

Thermal correction to Gibbs Free Energy in MeOH at B3LYP/BSI level=0.311801

Sum of electronic and thermal Enthalpies in MeOH at B3LYP/BSI level=-1201.886524

Sum of electronic and thermal Free Energies in MeOH at B3LYP/BSI level=-1201.977101

Sum of electronic Energies in MeOH at M06/BSII level =-1203.0544698

Thermal correction to Enthalpy in AcOH at B3LYP/BSI level=0.402971

Thermal correction to Gibbs Free Energy in AcOH at B3LYP/BSI level=0.314268

Sum of electronic and thermal Enthalpies in AcOH at B3LYP/BSI level=-1201.861646

Sum of electronic and thermal Free Energies in AcOH at B3LYP/BSI level=-1201.950348

Sum of electronic Energies in AcOH at M06/BSII level =-1203.0393408

|   |             |             |             |
|---|-------------|-------------|-------------|
| C | -0.61374400 | 0.51680100  | 0.21537500  |
| C | -0.56476500 | 1.94043500  | 0.00369200  |
| C | -1.59471500 | -0.29517200 | 0.62941000  |
| C | -2.96124900 | 0.19015400  | 1.05412900  |
| H | -3.27891900 | -0.29315700 | 1.98490700  |
| H | -2.95994300 | 1.26936500  | 1.24796800  |
| C | -4.02382200 | -0.06268200 | -0.00256500 |
| O | -3.80368900 | -0.22287000 | -1.19331100 |
| O | -5.25085000 | -0.05505800 | 0.52987100  |
| C | -6.37303600 | -0.22244800 | -0.38553500 |
| C | -7.63547400 | -0.20745000 | 0.44880600  |
| H | -6.24486600 | -1.16797700 | -0.92017700 |
| H | -6.35030300 | 0.59354100  | -1.11403600 |
| H | -8.50431600 | -0.33900500 | -0.20380200 |
| H | -7.63065200 | -1.02022800 | 1.18202100  |
| H | -7.74559900 | 0.74333400  | 0.97987400  |
| C | -1.33387300 | -1.78288200 | 0.69502700  |
| H | -2.19976600 | -2.34625300 | 0.31723000  |
| H | -1.20967900 | -2.09127800 | 1.74066700  |
| C | -0.10479400 | -2.16638900 | -0.10797600 |
| C | 0.05652800  | -1.79911500 | -1.43521700 |
| H | 0.54142400  | -2.94002900 | 0.30054400  |
| H | 0.82601200  | -2.26610700 | -2.04235200 |
| H | -0.71931700 | -1.24856200 | -1.95974900 |
| C | -0.95877700 | 2.46527300  | -1.34118700 |
| H | -0.45962800 | 1.90847100  | -2.14084700 |

|    |             |             |             |
|----|-------------|-------------|-------------|
| H  | -2.03535900 | 2.28686200  | -1.46860000 |
| H  | -0.75222500 | 3.53212500  | -1.44659300 |
| C  | 0.04535200  | 2.76989200  | 0.95776200  |
| H  | 1.21520400  | 2.32199500  | 0.65436700  |
| H  | 0.01859200  | 3.84488400  | 0.79067800  |
| H  | 0.02397900  | 2.44268200  | 1.99893400  |
| Pd | 1.19477000  | -0.36825600 | -0.22104000 |
| O  | 4.77019200  | -2.63717800 | -0.07028600 |
| O  | 4.09489900  | 1.27635200  | -0.87628600 |
| C  | 3.79431600  | -1.93531700 | 0.25112800  |
| O  | 2.92536600  | -1.53713700 | -0.62767000 |
| C  | 3.37770200  | 1.91607000  | -0.11433300 |
| O  | 2.22094700  | 1.45044200  | 0.35039900  |
| C  | 3.61163800  | -1.50540900 | 1.69829100  |
| H  | 2.57197400  | -1.62274500 | 2.01938500  |
| H  | 4.26722200  | -2.08393300 | 2.35270300  |
| H  | 3.86703900  | -0.44434800 | 1.79486500  |
| C  | 3.73192800  | 3.30007200  | 0.38056300  |
| H  | 4.71948600  | 3.58533700  | 0.01569400  |
| H  | 2.98910000  | 4.02173200  | 0.02374400  |
| H  | 3.71692600  | 3.32563300  | 1.47446700  |

## 2

Thermal correction to Enthalpy in MeOH at B3LYP/BSI level=0.408726

Thermal correction to Gibbs Free Energy in MeOH at B3LYP/BSI level=0.316157

Sum of electronic and thermal Enthalpies in MeOH at B3LYP/BSI level=-1201.902022

Sum of electronic and thermal Free Energies in MeOH at B3LYP/BSI level=-1201.99459

Sum of electronic Energies in MeOH at M06/BSII level =-1203.0803437

Thermal correction to Enthalpy in AcOH at B3LYP/BSI level=0.724488

Thermal correction to Gibbs Free Energy in AcOH at B3LYP/BSI level=0.603715

Sum of electronic and thermal Enthalpies in AcOH at B3LYP/BSI level=-1795.064222

Sum of electronic and thermal Free Energies in AcOH at B3LYP/BSI level=-1795.184995

Sum of electronic Energies in AcOH at M06/BSII level =-1796.2802849

|   |             |             |             |
|---|-------------|-------------|-------------|
| C | -0.51452700 | 0.53355600  | 0.30702600  |
| C | -0.48184100 | 2.00550700  | 0.23273500  |
| C | -1.55822400 | -0.25147100 | 0.63060200  |
| C | -2.92279700 | 0.26707400  | 1.02355600  |
| H | -3.27110100 | -0.18514300 | 1.95892400  |
| H | -2.89670500 | 1.35079600  | 1.18363100  |
| C | -3.96047900 | 0.00709400  | -0.05481500 |
| O | -3.71884200 | -0.07434100 | -1.24991000 |
| O | -5.19361600 | -0.09462300 | 0.45767000  |
| C | -6.28650900 | -0.30322600 | -0.48370800 |
| C | -7.56462800 | -0.39044200 | 0.32247700  |
| H | -6.08965100 | -1.22375800 | -1.04106300 |

|    |             |             |             |
|----|-------------|-------------|-------------|
| H  | -6.30190600 | 0.53152300  | -1.19063900 |
| H  | -8.40898400 | -0.56163700 | -0.35278700 |
| H  | -7.52438400 | -1.21846700 | 1.03731700  |
| H  | -7.74855000 | 0.53778800  | 0.87270100  |
| C  | -1.37937100 | -1.75305200 | 0.58789600  |
| H  | -2.26947500 | -2.25002000 | 0.17398100  |
| H  | -1.26499200 | -2.14780200 | 1.60565500  |
| C  | -0.16975400 | -2.12466400 | -0.24777600 |
| C  | 0.02215300  | -1.62053800 | -1.53162000 |
| H  | 0.41343700  | -2.98890800 | 0.06341600  |
| H  | 0.76197800  | -2.06808100 | -2.18931200 |
| H  | -0.72369500 | -0.98131700 | -1.99510300 |
| C  | -0.48382300 | 2.60663100  | -1.15438700 |
| H  | -1.37774300 | 2.28726400  | -1.70480500 |
| H  | -0.46606400 | 3.69989500  | -1.11908500 |
| H  | 0.38337400  | 2.26499100  | -1.73232900 |
| C  | -0.43813000 | 2.76102100  | 1.34581900  |
| H  | 2.23661300  | 1.78678300  | 1.40343600  |
| Pd | 1.20012500  | -0.42044900 | -0.15630800 |
| O  | 4.78339100  | -2.78674900 | -0.11210300 |
| O  | 3.46329500  | 1.73376800  | -1.37272800 |
| C  | 3.78989700  | -2.11101300 | 0.22245900  |
| O  | 2.99936900  | -1.55930800 | -0.63933900 |
| C  | 3.21500200  | 2.14610600  | -0.26135200 |
| O  | 2.52239600  | 1.32991800  | 0.59227700  |
| C  | 3.47980100  | -1.90837300 | 1.70103800  |
| H  | 2.46941900  | -2.26323900 | 1.93152700  |
| H  | 4.19916700  | -2.44351200 | 2.32486400  |
| H  | 3.51577100  | -0.84197400 | 1.94779800  |
| C  | 3.60298000  | 3.48183300  | 0.29988000  |
| H  | 2.69880600  | 4.04400900  | 0.55931400  |
| H  | 4.18724000  | 3.34771800  | 1.21587600  |
| H  | 4.18374800  | 4.03417000  | -0.43831600 |
| H  | -0.42796200 | 3.84753000  | 1.29157800  |
| H  | -0.43055200 | 2.31648200  | 2.33767700  |

## HOAC

Thermal correction to Enthalpy in MeOH at B3LYP/BSI level=0.066136

Thermal correction to Gibbs Free Energy in MeOH at B3LYP/BSI level=0.035401

Sum of electronic and thermal Enthalpies in MeOH at B3LYP/BSI level=-229.031233

Sum of electronic and thermal Free Energies in MeOH at B3LYP/BSI level=-229.061968

Sum of electronic Energies in MeOH at M06/BSII level =-229.0423987

Thermal correction to Enthalpy in AcOH at B3LYP/BSI level=0.066256

Thermal correction to Gibbs Free Energy in AcOH at B3LYP/BSI level=0.035535

Sum of electronic and thermal Enthalpies in AcOH at B3LYP/BSI level=-229.024668

Sum of electronic and thermal Free Energies in AcOH at B3LYP/BSI level=-229.055389

Sum of electronic Energies in AcOH at M06/BSII level =-229.0355543

|   |             |             |             |
|---|-------------|-------------|-------------|
| H | 1.73472500  | -0.81811700 | 0.00030900  |
| O | 0.63534800  | 1.20871000  | 0.00001700  |
| C | 0.08950000  | 0.11772200  | -0.00011500 |
| O | 0.78477800  | -1.03643100 | -0.00002600 |
| C | -1.39310400 | -0.11723700 | -0.00004500 |
| H | -1.92109600 | 0.83623200  | -0.00449800 |
| H | -1.67612600 | -0.70378600 | -0.87992000 |
| H | -1.67689000 | -0.69547500 | 0.88513600  |

### 3

Thermal correction to Enthalpy in MeOH at B3LYP/BSI level=0.338957

Thermal correction to Gibbs Free Energy in MeOH at B3LYP/BSI level=0.257996

Sum of electronic and thermal Enthalpies in MeOH at B3LYP/BSI level=-972.877798

Sum of electronic and thermal Free Energies in MeOH at B3LYP/BSI level=-972.958758

Sum of electronic Energies in MeOH at M06/BSII level =-974.0392709

Thermal correction to Enthalpy in AcOH at B3LYP/BSI level=0.339324

Thermal correction to Gibbs Free Energy in AcOH at B3LYP/BSI level=0.259405

Sum of electronic and thermal Enthalpies in AcOH at B3LYP/BSI level=-972.861571

Sum of electronic and thermal Free Energies in AcOH at B3LYP/BSI level=-972.94149

Sum of electronic Energies in AcOH at M06/BSII level =-974.022934

|   |             |             |             |
|---|-------------|-------------|-------------|
| C | -0.28445200 | 0.54850300  | 0.39160900  |
| C | 0.15067200  | 1.88717100  | 0.23744100  |
| C | -1.22462200 | -0.37686400 | 0.56369000  |
| C | -2.60473200 | -0.06494000 | 1.08915100  |
| H | -2.89920800 | -0.76378600 | 1.87952700  |
| H | -2.63521400 | 0.94028000  | 1.52519600  |
| C | -3.65878500 | -0.09638700 | -0.00674300 |
| O | -3.42976900 | 0.01575500  | -1.20054900 |
| O | -4.88779600 | -0.22740000 | 0.50498600  |
| C | -6.00129200 | -0.19795800 | -0.43660500 |
| C | -7.27729200 | -0.32180100 | 0.36815800  |
| H | -5.87829800 | -1.02519400 | -1.14151900 |
| H | -5.95719600 | 0.74158500  | -0.99496100 |
| H | -8.13566700 | -0.30404000 | -0.31098300 |
| H | -7.30312700 | -1.26221400 | 0.92753900  |
| H | -7.38165200 | 0.50901300  | 1.07301300  |
| C | -0.87591100 | -1.79569100 | 0.16816900  |
| H | -1.41615100 | -2.05274700 | -0.75323600 |
| H | -1.22290500 | -2.49783800 | 0.93669600  |
| C | 0.62295200  | -1.98573400 | -0.03957700 |
| C | 1.25161600  | -1.91149200 | -1.25069700 |
| H | 1.18815200  | -2.33665900 | 0.82275900  |
| H | 2.28506500  | -2.22439300 | -1.36344600 |

|    |             |             |             |
|----|-------------|-------------|-------------|
| H  | 0.69322600  | -1.70467000 | -2.16091100 |
| C  | -0.44578000 | 2.79518900  | -0.80874200 |
| H  | -1.19947600 | 3.42836200  | -0.32357700 |
| H  | 0.31072800  | 3.45069300  | -1.24867600 |
| H  | -0.94654600 | 2.22901300  | -1.59715500 |
| C  | 1.37194200  | 2.15950000  | 0.87574300  |
| Pd | 1.60187600  | 0.16868200  | -0.17155400 |
| O  | 3.73827700  | 0.13252000  | -0.65845600 |
| C  | 4.46337800  | -0.39360700 | 0.26714600  |
| O  | 4.02388700  | -0.84253100 | 1.34915700  |
| C  | 5.96097900  | -0.41870400 | -0.00892400 |
| H  | 6.46212800  | -1.14589700 | 0.63384300  |
| H  | 6.16385000  | -0.64708400 | -1.05877100 |
| H  | 6.37966100  | 0.57308400  | 0.19963800  |
| H  | 1.94967600  | 3.03407200  | 0.58889600  |
| H  | 1.60783900  | 1.70922100  | 1.83758800  |

### R2

Thermal correction to Enthalpy in MeOH at B3LYP/BSI level=0.383492

Thermal correction to Gibbs Free Energy in MeOH at B3LYP/BSI level=0.315828

Sum of electronic and thermal Enthalpies in MeOH at B3LYP/BSI level=-822.202222

Sum of electronic and thermal Free Energies in MeOH at B3LYP/BSI level=-822.269886

Sum of electronic Energies in MeOH at M06/BSII level =-822.2501875

Thermal correction to Enthalpy in AcOH at B3LYP/BSI level=0.383803

Thermal correction to Gibbs Free Energy in AcOH at B3LYP/BSI level=0.316182

Sum of electronic and thermal Enthalpies in AcOH at B3LYP/BSI level=-822.192827

Sum of electronic and thermal Free Energies in AcOH at B3LYP/BSI level=-822.260447

Sum of electronic Energies in AcOH at M06/BSII level =-822.2402307

|   |             |             |             |
|---|-------------|-------------|-------------|
| C | -3.01424900 | 0.74069600  | -0.26630600 |
| C | -3.01431800 | -0.74067500 | 0.26634900  |
| B | -0.85263400 | -0.00020500 | -0.00038200 |
| O | -1.61355600 | 1.14229000  | -0.06855200 |
| O | -1.61371400 | -1.14259300 | 0.06809800  |
| C | -3.90425300 | -1.70757900 | -0.50746700 |
| H | -3.81619700 | -2.71231900 | -0.08203600 |
| H | -4.95395200 | -1.40483100 | -0.43722200 |
| H | -3.62853000 | -1.76078900 | -1.56288900 |
| C | -3.28539100 | -0.85437300 | 1.76960000  |
| H | -4.33032100 | -0.63227800 | 2.00475800  |
| H | -3.07323300 | -1.87782000 | 2.09413100  |
| H | -2.64758600 | -0.17694600 | 2.34529800  |
| C | -3.28584900 | 0.85446100  | -1.76947200 |
| H | -4.33077000 | 0.63201500  | -2.00435300 |
| H | -3.07418700 | 1.87802900  | -2.09395900 |
| H | -2.64800000 | 0.17735900  | -2.34550300 |

|                                                                                     |             |             |             |    |              |             |             |
|-------------------------------------------------------------------------------------|-------------|-------------|-------------|----|--------------|-------------|-------------|
| C                                                                                   | -3.90381100 | 1.70769900  | 0.50783100  | O  | -7.29063700  | -0.59449600 | -0.91809000 |
| H                                                                                   | -3.81542000 | 2.71252300  | 0.08267800  | C  | -8.14165800  | 0.17599200  | -1.81657500 |
| H                                                                                   | -4.95360800 | 1.40530900  | 0.43748700  | C  | -9.56249500  | -0.30419100 | -1.61557900 |
| H                                                                                   | -3.62802900 | 1.76050600  | 1.56325600  | H  | -7.79446300  | 0.01581800  | -2.84160600 |
| C                                                                                   | 3.01416400  | 0.74065000  | 0.26649900  | H  | -8.02919900  | 1.23682600  | -1.57561500 |
| C                                                                                   | 3.01436300  | -0.74057700 | -0.26643400 | H  | -10.22939900 | 0.25390900  | -2.28058800 |
| B                                                                                   | 0.85258500  | -0.00012000 | -0.00047600 | H  | -9.65746600  | -1.36929300 | -1.84911000 |
| O                                                                                   | 1.61346700  | 1.14235100  | 0.06832200  | H  | -9.89098300  | -0.14036100 | -0.58442500 |
| O                                                                                   | 1.61372400  | -1.14247900 | -0.06894300 | C  | -2.96209900  | -1.38835800 | -1.13164800 |
| C                                                                                   | 3.90392000  | -1.70759100 | 0.50769300  | H  | -3.12246300  | -0.68654700 | -1.96012100 |
| H                                                                                   | 3.81581800  | -2.71233000 | 0.08226900  | H  | -3.33102900  | -2.36370600 | -1.47388000 |
| H                                                                                   | 4.95368500  | -1.40500600 | 0.43775100  | C  | -1.47268300  | -1.50064700 | -0.82595900 |
| H                                                                                   | 3.62785600  | -1.76070600 | 1.56303700  | C  | -0.53837300  | -0.55378400 | -1.14755100 |
| C                                                                                   | 3.28631300  | -0.85394100 | -1.76957100 | H  | -1.13294400  | -2.47002100 | -0.46251700 |
| H                                                                                   | 4.33141500  | -0.63196700 | -2.00407400 | H  | 0.52111400   | -0.77625200 | -1.08133200 |
| H                                                                                   | 3.07415900  | -1.87726900 | -2.09448500 | H  | -0.82647600  | 0.36314900  | -1.65572000 |
| H                                                                                   | 2.64895900  | -0.17625400 | -2.34546700 | C  | -3.48058500  | 1.84309700  | 2.29349600  |
| C                                                                                   | 3.28522300  | 0.85398100  | 1.76977700  | H  | -4.50603100  | 1.81717100  | 2.68340200  |
| H                                                                                   | 4.33017500  | 0.63192700  | 2.00490000  | H  | -2.87798100  | 2.46157200  | 2.96385400  |
| H                                                                                   | 3.07297600  | 1.87731500  | 2.09460500  | H  | -3.51480100  | 2.30278600  | 1.30313000  |
| H                                                                                   | 2.64750400  | 0.17632300  | 2.34529800  | C  | -2.06198000  | -0.08442500 | 3.17891000  |
| C                                                                                   | 3.90396200  | 1.70781900  | -0.50711300 | Pd | -1.05153200  | -0.25162800 | 1.13036100  |
| H                                                                                   | 3.81551400  | 2.71252600  | -0.08169100 | O  | 0.83752000   | 1.83142400  | 2.54355600  |
| H                                                                                   | 4.95373800  | 1.40538700  | -0.43661000 | C  | 1.48752100   | 0.77554500  | 2.37332800  |
| H                                                                                   | 3.62846000  | 1.76094300  | -1.56259800 | O  | 1.07561100   | -0.23639100 | 1.68759400  |
| <b>4</b>                                                                            |             |             |             | C  | 2.85167000   | 0.61055200  | 3.02913100  |
| Thermal correction to Enthalpy in MeOH at B3LYP/BSI level=0.724958                  |             |             |             | H  | 3.58231000   | 0.21533700  | 2.32002600  |
| Thermal correction to Gibbs Free Energy in MeOH at B3LYP/BSI level=0.59733          |             |             |             | H  | 3.20665500   | 1.55965300  | 3.43567000  |
| Sum of electronic and thermal Enthalpies in MeOH at B3LYP/BSI level=-1795.085958    |             |             |             | H  | 2.76557300   | -0.11370600 | 3.84796300  |
| Sum of electronic and thermal Free Energies in MeOH at B3LYP/BSI level=-1795.213585 |             |             |             | H  | -1.67707400  | 0.55421800  | 3.96852500  |
| Sum of electronic Energies in MeOH at M06/BSII level =-1796.3018502                 |             |             |             | H  | -1.94968700  | -1.15828800 | 3.31357500  |
| Thermal correction to Enthalpy in AcOH at B3LYP/BSI level=0.726                     |             |             |             | C  | 3.61345400   | -2.97912700 | -1.23487900 |
| Thermal correction to Gibbs Free Energy in AcOH at B3LYP/BSI level=0.599983         |             |             |             | C  | 4.34088600   | -2.70244200 | 0.13584400  |
| Sum of electronic and thermal Enthalpies in AcOH at B3LYP/BSI level=-1795.062007    |             |             |             | B  | 3.54315400   | -0.72721600 | -0.74795300 |
| Sum of electronic and thermal Free Energies in AcOH at B3LYP/BSI level=-1795.188024 |             |             |             | O  | 2.92408200   | -1.70551200 | -1.48937400 |
| Sum of electronic Energies in AcOH at M06/BSII level =-1796.2779658                 |             |             |             | O  | 4.46651500   | -1.23698200 | 0.13360900  |
| C                                                                                   | -3.05152500 | -0.35164800 | 1.05401900  | C  | 5.74111700   | -3.29630700 | 0.26011800  |
| C                                                                                   | -2.95936100 | 0.42952600  | 2.23552800  | H  | 6.17738900   | -3.00156600 | 1.21964100  |
| C                                                                                   | -3.74888000 | -0.92217700 | 0.07361300  | H  | 5.70231900   | -4.39005800 | 0.23187600  |
| C                                                                                   | -5.24437000 | -1.11643400 | 0.12792900  | H  | 6.40701500   | -2.95178800 | -0.53389400 |
| H                                                                                   | -5.50877600 | -2.16617200 | -0.05083600 | C  | 3.50314500   | -3.06626100 | 1.36579800  |
| H                                                                                   | -5.63770500 | -0.86018500 | 1.11769700  | H  | 3.37455500   | -4.14914100 | 1.45193100  |
| C                                                                                   | -5.99297200 | -0.26790500 | -0.88655600 | H  | 4.01691000   | -2.71580700 | 2.26629100  |
| O                                                                                   | -5.49975300 | 0.61184900  | -1.57366700 | H  | 2.51767500   | -2.59429800 | 1.33550900  |

|                                                                                     |             |             |             |    |             |             |             |
|-------------------------------------------------------------------------------------|-------------|-------------|-------------|----|-------------|-------------|-------------|
| C                                                                                   | 4.57214400  | -3.18639900 | -2.41125300 | H  | -5.16381700 | -1.85449100 | 0.11582800  |
| H                                                                                   | 5.09198900  | -4.14622900 | -2.33836100 | H  | -4.77969500 | -0.67437000 | 1.35839900  |
| H                                                                                   | 4.00000700  | -3.17920900 | -3.34415000 | C  | -5.33585000 | 0.18189900  | -0.49150400 |
| H                                                                                   | 5.31910700  | -2.38891800 | -2.46548700 | O  | -4.77798000 | 1.10367500  | -1.06779200 |
| C                                                                                   | 2.56849300  | -4.08994300 | -1.20380000 | O  | -6.66757200 | 0.03569500  | -0.45456000 |
| H                                                                                   | 2.10333500  | -4.18565100 | -2.19024400 | C  | -7.46155500 | 1.05915000  | -1.12196300 |
| H                                                                                   | 3.03318600  | -5.05037800 | -0.95910800 | C  | -8.91929100 | 0.71979500  | -0.89756900 |
| H                                                                                   | 1.78045300  | -3.89009600 | -0.47423500 | H  | -7.19987400 | 1.06096200  | -2.18425000 |
| C                                                                                   | 2.30117500  | 2.92708100  | -1.63524300 | H  | -7.19850300 | 2.03330400  | -0.69982500 |
| C                                                                                   | 3.50125900  | 3.21334600  | -0.65003800 | H  | -9.54497800 | 1.47224600  | -1.38836900 |
| B                                                                                   | 3.22969100  | 0.94046900  | -0.91448700 | H  | -9.16637800 | -0.25966100 | -1.31909200 |
| O                                                                                   | 2.44248800  | 1.48663000  | -1.89949200 | H  | -9.16371200 | 0.71472600  | 0.16939000  |
| O                                                                                   | 3.77128800  | 1.88705200  | -0.07992400 | C  | -2.82347700 | -1.55367200 | -1.41536500 |
| C                                                                                   | 3.18501500  | 4.16549200  | 0.49959900  | H  | -3.53199600 | -1.18423600 | -2.17079100 |
| H                                                                                   | 4.07614600  | 4.29388400  | 1.12239500  | H  | -2.91852800 | -2.64740200 | -1.42624900 |
| H                                                                                   | 2.89745500  | 5.15131600  | 0.12043000  | C  | -1.41561600 | -1.15743400 | -1.81392000 |
| H                                                                                   | 2.38232900  | 3.78288400  | 1.13353100  | C  | -0.95905500 | 0.14733700  | -1.72389700 |
| C                                                                                   | 4.79201500  | 3.64421800  | -1.35383400 | H  | -0.84346100 | -1.87301000 | -2.40014000 |
| H                                                                                   | 4.70720700  | 4.65561200  | -1.76191200 | H  | -0.03644300 | 0.44093300  | -2.21595300 |
| H                                                                                   | 5.61077600  | 3.63859500  | -0.62777800 | H  | -1.61840400 | 0.94992600  | -1.40675300 |
| H                                                                                   | 5.05578400  | 2.96088600  | -2.16638400 | C  | -1.87894500 | 1.31303900  | 2.34723900  |
| C                                                                                   | 0.91991500  | 3.12489200  | -1.00467500 | H  | -2.49166800 | 1.97751500  | 1.72473200  |
| H                                                                                   | 0.71947900  | 4.18461600  | -0.81931000 | H  | -1.97886400 | 1.62509200  | 3.39104100  |
| H                                                                                   | 0.15560500  | 2.75497700  | -1.69521800 | H  | -0.83804000 | 1.46099300  | 2.03780600  |
| H                                                                                   | 0.82207100  | 2.58312800  | -0.06076800 | C  | -2.73928100 | -0.88553300 | 3.17543800  |
| C                                                                                   | 2.37416300  | 3.66216000  | -2.97104800 | Pd | -0.30024300 | -0.90224900 | 0.08772900  |
| H                                                                                   | 1.51593000  | 3.38489700  | -3.59163100 | O  | 0.43586800  | -1.33095900 | 2.05290600  |
| H                                                                                   | 2.33951800  | 4.74530500  | -2.81662500 | C  | 1.59907600  | -1.01584800 | 2.48541900  |
| H                                                                                   | 3.28397200  | 3.42004200  | -3.52477200 | O  | 2.54310800  | -0.52151500 | 1.81280100  |
| <b>TS2</b>                                                                          |             |             |             | C  | 1.84364900  | -1.30538600 | 3.95621400  |
| Thermal correction to Enthalpy in MeOH at B3LYP/BSI level=0.723982                  |             |             |             | H  | 0.96898500  | -1.02825500 | 4.55076500  |
| Thermal correction to Gibbs Free Energy in MeOH at B3LYP/BSI level=0.603383         |             |             |             | H  | 2.00361300  | -2.38258300 | 4.08370300  |
| Sum of electronic and thermal Enthalpies in MeOH at B3LYP/BSI level=-1795.084812    |             |             |             | H  | 2.72819100  | -0.77632100 | 4.31566700  |
| Sum of electronic and thermal Free Energies in MeOH at B3LYP/BSI level=-1795.20541  |             |             |             | H  | -2.84270200 | -0.47955100 | 4.17949400  |
| Sum of electronic Energies in MeOH at M06/BSII level =-1796.3017366                 |             |             |             | H  | -3.01135600 | -1.92800800 | 3.03389100  |
| Thermal correction to Enthalpy in AcOH at B3LYP/BSI level=0.724488                  |             |             |             | C  | 2.45884200  | -2.38431600 | -1.29804400 |
| Thermal correction to Gibbs Free Energy in AcOH at B3LYP/BSI level=0.603715         |             |             |             | C  | 3.92788100  | -2.29606300 | -0.71757200 |
| Sum of electronic and thermal Enthalpies in AcOH at B3LYP/BSI level=-1795.064222    |             |             |             | B  | 2.80825300  | -0.31600700 | -0.20331600 |
| Sum of electronic and thermal Free Energies in AcOH at B3LYP/BSI level=-1795.184995 |             |             |             | O  | 1.81633800  | -1.19232700 | -0.72015700 |
| Sum of electronic Energies in AcOH at M06/BSII level =-1796.2802849                 |             |             |             | O  | 4.06509100  | -0.88585300 | -0.38300000 |
| C                                                                                   | -2.17108800 | -0.67764700 | 0.79542400  | C  | 5.02758600  | -2.63827400 | -1.72400100 |
| C                                                                                   | -2.29442200 | -0.12744900 | 2.15818000  | H  | 6.00503600  | -2.52283900 | -1.24453400 |
| C                                                                                   | -3.16749900 | -1.02255800 | -0.04136300 | H  | 4.94235500  | -3.67554500 | -2.06343500 |
| C                                                                                   | -4.63616200 | -0.91029300 | 0.29857800  | H  | 5.00319900  | -1.98227300 | -2.59680900 |

|                                                                                     |             |             |             |    |             |             |             |
|-------------------------------------------------------------------------------------|-------------|-------------|-------------|----|-------------|-------------|-------------|
| C                                                                                   | 4.14935900  | -3.11365200 | 0.56191300  | C  | -2.11927400 | -0.44384300 | 0.91520900  |
| H                                                                                   | 4.15022500  | -4.18750900 | 0.35243500  | C  | -2.18455700 | 0.44120100  | 2.09226000  |
| H                                                                                   | 5.12681500  | -2.85117100 | 0.97901500  | C  | -3.14536100 | -0.99455400 | 0.24050600  |
| H                                                                                   | 3.39393400  | -2.90650000 | 1.32124100  | C  | -4.60069100 | -0.80875400 | 0.60381500  |
| C                                                                                   | 2.38894200  | -2.20914700 | -2.81841700 | H  | -5.10712700 | -1.77296800 | 0.73299000  |
| H                                                                                   | 2.83251000  | -3.06239300 | -3.33976100 | H  | -4.70479800 | -0.27266800 | 1.55302800  |
| H                                                                                   | 1.34168000  | -2.13622700 | -3.12715600 | C  | -5.36229900 | -0.00961900 | -0.43874000 |
| H                                                                                   | 2.90226800  | -1.29870600 | -3.14078600 | O  | -4.85495300 | 0.73496700  | -1.26408900 |
| C                                                                                   | 1.68101500  | -3.62722300 | -0.87431700 | O  | -6.68492000 | -0.19276100 | -0.32692900 |
| H                                                                                   | 0.67348000  | -3.60072400 | -1.30080200 | C  | -7.53425500 | 0.56135200  | -1.23968000 |
| H                                                                                   | 2.17612200  | -4.53089700 | -1.24467600 | C  | -8.97156700 | 0.28420100  | -0.85490300 |
| H                                                                                   | 1.59026800  | -3.70282400 | 0.21120300  | H  | -7.31323500 | 0.23751900  | -2.26127100 |
| C                                                                                   | 3.07221500  | 3.58251200  | -0.74479600 | H  | -7.28455100 | 1.62257700  | -1.15259700 |
| C                                                                                   | 1.86613000  | 3.51121400  | 0.26131100  | H  | -9.63838600 | 0.83457600  | -1.52643500 |
| B                                                                                   | 2.63406700  | 1.38228800  | -0.20309900 | H  | -9.20575200 | -0.78190100 | -0.93730700 |
| O                                                                                   | 3.62273100  | 2.22493900  | -0.66372400 | H  | -9.17368800 | 0.60919100  | 0.17053000  |
| O                                                                                   | 1.52312700  | 2.08180500  | 0.22840700  | C  | -2.84514300 | -1.86353100 | -0.96005600 |
| C                                                                                   | 0.63584600  | 4.31623800  | -0.14466700 | H  | -3.58469600 | -1.70989800 | -1.75895100 |
| H                                                                                   | -0.15228000 | 4.19513500  | 0.60545600  | H  | -2.91956000 | -2.92296600 | -0.68195400 |
| H                                                                                   | 0.87696600  | 5.38245600  | -0.20482200 | C  | -1.45934700 | -1.57334100 | -1.50090500 |
| H                                                                                   | 0.23747600  | 3.99583600  | -1.10996500 | C  | -1.01793300 | -0.28185900 | -1.75073100 |
| C                                                                                   | 2.25931400  | 3.83059100  | 1.70711200  | H  | -0.90675000 | -2.40720800 | -1.92702100 |
| H                                                                                   | 2.48283700  | 4.89398300  | 1.83512900  | H  | -0.12177200 | -0.10959700 | -2.33850900 |
| H                                                                                   | 1.42698100  | 3.57777800  | 2.37108300  | H  | -1.68050300 | 0.56703400  | -1.61172000 |
| H                                                                                   | 3.13267700  | 3.25157100  | 2.02162100  | C  | -1.73046600 | 1.86950700  | 1.89987700  |
| C                                                                                   | 2.64674100  | 3.79002700  | -2.20232000 | H  | -2.30507800 | 2.35727700  | 1.10259200  |
| H                                                                                   | 2.28985800  | 4.80947600  | -2.37601400 | H  | -1.84867400 | 2.45065000  | 2.81920200  |
| H                                                                                   | 3.50955600  | 3.61675700  | -2.85297200 | H  | -0.67622600 | 1.90684900  | 1.60374000  |
| H                                                                                   | 1.85724500  | 3.09078100  | -2.49374000 | C  | -2.61263500 | -0.01832200 | 3.28119400  |
| C                                                                                   | 4.17402900  | 4.56935200  | -0.37153000 | Pd | -0.27379000 | -0.86482800 | 0.22619100  |
| H                                                                                   | 4.97599700  | 4.52279300  | -1.11535600 | O  | 0.56596000  | -0.72173400 | 2.23210500  |
| H                                                                                   | 3.78957200  | 5.59439600  | -0.35807800 | C  | 1.77270400  | -0.66542600 | 2.58660600  |
| H                                                                                   | 4.60640300  | 4.34723300  | 0.60644300  | O  | 2.79229000  | -0.59554200 | 1.80549800  |
| <b>5</b>                                                                            |             |             |             | C  | 2.09308000  | -0.65718000 | 4.06035100  |
| Thermal correction to Enthalpy in MeOH at B3LYP/BSI level=0.724391                  |             |             |             | H  | 1.21425100  | -0.91840100 | 4.65082700  |
| Thermal correction to Gibbs Free Energy in MeOH at B3LYP/BSI level=0.6025           |             |             |             | H  | 2.91079000  | -1.35225700 | 4.26971800  |
| Sum of electronic and thermal Enthalpies in MeOH at B3LYP/BSI level=-1795.088722    |             |             |             | H  | 2.43202100  | 0.34623000  | 4.34223600  |
| Sum of electronic and thermal Free Energies in MeOH at B3LYP/BSI level=-1795.210613 |             |             |             | H  | -2.67980600 | 0.63570900  | 4.14792300  |
| Sum of electronic Energies in MeOH at M06/BSII level =-1796.3058702                 |             |             |             | H  | -2.90650900 | -1.05490800 | 3.42182500  |
| Thermal correction to Enthalpy in AcOH at B3LYP/BSI level=0.725155                  |             |             |             | C  | 2.53906300  | -2.33961100 | -1.19822000 |
| Thermal correction to Gibbs Free Energy in AcOH at B3LYP/BSI level=0.604075         |             |             |             | C  | 4.01228000  | -2.23780900 | -0.64978900 |
| Sum of electronic and thermal Enthalpies in AcOH at B3LYP/BSI level=-1795.068543    |             |             |             | B  | 2.80588500  | -0.41094400 | 0.22522400  |
| Sum of electronic and thermal Free Energies in AcOH at B3LYP/BSI level=-1795.189623 |             |             |             | O  | 1.84202000  | -1.38685300 | -0.34463000 |
| Sum of electronic Energies in AcOH at M06/BSII level =-1796.2854536                 |             |             |             | O  | 4.10047800  | -0.85954100 | -0.23366600 |



|                                                                                     |            |             |             |                                                                                     |             |             |             |
|-------------------------------------------------------------------------------------|------------|-------------|-------------|-------------------------------------------------------------------------------------|-------------|-------------|-------------|
| C                                                                                   | 5.09546300 | -2.48073000 | -1.70310100 | Thermal correction to Gibbs Free Energy in AcOH at B3LYP/BSI level=0.604508         |             |             |             |
| H                                                                                   | 6.08385700 | -2.39592500 | -1.23872300 | Sum of electronic and thermal Enthalpies in AcOH at B3LYP/BSI level=-1795.050518    |             |             |             |
| H                                                                                   | 5.01372300 | -3.48402500 | -2.13430400 | Sum of electronic and thermal Free Energies in AcOH at B3LYP/BSI level=-1795.169885 |             |             |             |
| H                                                                                   | 5.04244000 | -1.74739500 | -2.51113500 | Sum of electronic Energies in AcOH at M06/BSII level =-1796.2717914                 |             |             |             |
| C                                                                                   | 4.27349300 | -3.15269000 | 0.56032300  | C                                                                                   | -2.10856400 | -0.66960100 | 0.49049700  |
| H                                                                                   | 4.35136500 | -4.20379400 | 0.26411200  | C                                                                                   | -2.47779400 | -1.55984000 | 1.60337400  |
| H                                                                                   | 5.22370400 | -2.86087900 | 1.01957200  | C                                                                                   | -2.92991700 | -0.21396800 | -0.47179700 |
| H                                                                                   | 3.49267100 | -3.06639600 | 1.31952800  | C                                                                                   | -4.38546600 | -0.60068900 | -0.62052500 |
| C                                                                                   | 2.40842600 | -1.85838300 | -2.64958900 | H                                                                                   | -4.62146100 | -0.90380400 | -1.64762700 |
| H                                                                                   | 2.90248400 | -2.54289800 | -3.34582900 | H                                                                                   | -4.63428700 | -1.44809000 | 0.02906900  |
| H                                                                                   | 1.35044800 | -1.81449800 | -2.92572600 | C                                                                                   | -5.33133100 | 0.52096900  | -0.23126600 |
| H                                                                                   | 2.83686500 | -0.86016000 | -2.77924900 | O                                                                                   | -5.05441500 | 1.44838900  | 0.51522700  |
| C                                                                                   | 1.90111600 | -3.71884400 | -1.04535000 | O                                                                                   | -6.54300100 | 0.36037800  | -0.78341800 |
| H                                                                                   | 0.88086400 | -3.71132500 | -1.44135800 | C                                                                                   | -7.56593700 | 1.33434500  | -0.42649400 |
| H                                                                                   | 2.46761700 | -4.46846800 | -1.60844100 | C                                                                                   | -8.84513600 | 0.92322200  | -1.12360800 |
| H                                                                                   | 1.85634400 | -4.03404300 | -0.00040800 | H                                                                                   | -7.22662700 | 2.32507600  | -0.74355900 |
| C                                                                                   | 2.27134600 | 3.19965800  | -1.36929900 | H                                                                                   | -7.67590400 | 1.33937600  | 0.66181700  |
| C                                                                                   | 2.25291200 | 3.54502400  | 0.16541100  | H                                                                                   | -9.63856700 | 1.63529600  | -0.87468500 |
| B                                                                                   | 2.51023500 | 1.26083700  | -0.11891300 | H                                                                                   | -8.71841200 | 0.91793800  | -2.21084700 |
| O                                                                                   | 2.74472800 | 1.81254000  | -1.36633100 | H                                                                                   | -9.16676900 | -0.07300800 | -0.80361800 |
| O                                                                                   | 2.07172500 | 2.22296700  | 0.77738500  | C                                                                                   | -2.37749200 | 0.74547000  | -1.50307600 |
| C                                                                                   | 1.11270300 | 4.45439600  | 0.61306500  | H                                                                                   | -3.11241900 | 1.52638200  | -1.75424000 |
| H                                                                                   | 1.15399700 | 4.59142100  | 1.69856300  | H                                                                                   | -2.18024500 | 0.21687200  | -2.44564500 |
| H                                                                                   | 1.20367200 | 5.44200700  | 0.14903800  | C                                                                                   | -1.10646100 | 1.40569700  | -1.00819100 |
| H                                                                                   | 0.13336900 | 4.04386800  | 0.35921300  | C                                                                                   | -1.02555800 | 1.97848900  | 0.26650600  |
| C                                                                                   | 3.58953500 | 4.08302600  | 0.68867400  | H                                                                                   | -0.38312600 | 1.71360300  | -1.75816400 |
| H                                                                                   | 3.78174800 | 5.09835200  | 0.32946700  | H                                                                                   | -0.26611500 | 2.71995800  | 0.49066500  |
| H                                                                                   | 3.56021500 | 4.10955400  | 1.78262200  | H                                                                                   | -1.88842500 | 1.97320400  | 0.92616900  |
| H                                                                                   | 4.42446500 | 3.44277900  | 0.38863200  | C                                                                                   | -1.92055700 | -2.96684600 | 1.58091700  |
| C                                                                                   | 0.88060200 | 3.18961900  | -2.01153600 | H                                                                                   | -0.82773800 | -2.96487700 | 1.52235200  |
| H                                                                                   | 0.47927600 | 4.20217700  | -2.11585100 | H                                                                                   | -2.21977300 | -3.53065600 | 2.46997600  |
| H                                                                                   | 0.95155400 | 2.75051200  | -3.01177000 | H                                                                                   | -2.28139400 | -3.50651700 | 0.69550600  |
| H                                                                                   | 0.17464400 | 2.59439400  | -1.42564300 | C                                                                                   | -3.27087800 | -1.13447300 | 2.60674900  |
| C                                                                                   | 3.23354400 | 4.03312000  | -2.21126900 | Pd                                                                                  | -0.11819700 | 0.00559300  | 0.37058500  |
| H                                                                                   | 3.20035300 | 3.69462500  | -3.25202000 | O                                                                                   | 0.52683700  | -0.78262000 | 2.47950400  |
| H                                                                                   | 2.94890200 | 5.09024800  | -2.19461000 | C                                                                                   | 1.71226000  | -1.09192600 | 2.64434700  |
| H                                                                                   | 4.26414200 | 3.94566700  | -1.86032900 | O                                                                                   | 2.56174400  | -1.23608700 | 1.64383500  |
| <b>TS3</b>                                                                          |            |             |             | C                                                                                   | 2.31766100  | -1.30335400 | 3.99866900  |
| Thermal correction to Enthalpy in MeOH at B3LYP/BSI level=0.722943                  |            |             |             | H                                                                                   | 1.54604100  | -1.27916900 | 4.76798900  |
| Thermal correction to Gibbs Free Energy in MeOH at B3LYP/BSI level=0.603379         |            |             |             | H                                                                                   | 2.85403300  | -2.25604100 | 4.02759500  |
| Sum of electronic and thermal Enthalpies in MeOH at B3LYP/BSI level=-1795.069673    |            |             |             | H                                                                                   | 3.04785800  | -0.50783400 | 4.18535500  |
| Sum of electronic and thermal Free Energies in MeOH at B3LYP/BSI level=-1795.189237 |            |             |             | H                                                                                   | -3.52941500 | -1.78517100 | 3.43971200  |
| Sum of electronic Energies in MeOH at M06/BSII level =-1796.2907777                 |            |             |             | H                                                                                   | -3.68243100 | -0.12881000 | 2.61890500  |
| Thermal correction to Enthalpy in AcOH at B3LYP/BSI level=0.723876                  |            |             |             | C                                                                                   | 1.45951600  | -2.45289500 | -1.56449700 |

|                                                                            |             |             |             |                                                                                     |             |             |             |
|----------------------------------------------------------------------------|-------------|-------------|-------------|-------------------------------------------------------------------------------------|-------------|-------------|-------------|
| C                                                                          | 3.02605400  | -2.28333500 | -1.58154300 | Sum of electronic and thermal Enthalpies in MeOH at B3LYP/BSI level=-1795.084136    |             |             |             |
| B                                                                          | 2.16220900  | -1.16135500 | 0.24257600  | Sum of electronic and thermal Free Energies in MeOH at B3LYP/BSI level=-1795.208865 |             |             |             |
| O                                                                          | 1.12949700  | -2.02884100 | -0.18922800 | Sum of electronic Energies in MeOH at M06/BSII level =-1796.3010226                 |             |             |             |
| O                                                                          | 3.24044800  | -1.17808600 | -0.64751800 | Thermal correction to Enthalpy in AcOH at B3LYP/BSI level=0.725411                  |             |             |             |
| C                                                                          | 3.61360700  | -1.89512400 | -2.93434000 | Thermal correction to Gibbs Free Energy in AcOH at B3LYP/BSI level=0.601039         |             |             |             |
| H                                                                          | 4.69984600  | -1.79140100 | -2.84592800 | Sum of electronic and thermal Enthalpies in AcOH at B3LYP/BSI level=-1795.06401     |             |             |             |
| H                                                                          | 3.41049000  | -2.66999200 | -3.68038100 | Sum of electronic and thermal Free Energies in AcOH at B3LYP/BSI level=-1795.188382 |             |             |             |
| H                                                                          | 3.21166700  | -0.94671700 | -3.29686700 | Sum of electronic Energies in AcOH at M06/BSII level =-1796.2812209                 |             |             |             |
| C                                                                          | 3.77287900  | -3.49434400 | -1.00984500 | C                                                                                   | 2.14725200  | 0.47721700  | 0.79668100  |
| H                                                                          | 3.72237000  | -4.35257400 | -1.68645300 | C                                                                                   | 2.52213900  | 1.08913000  | 2.08169300  |
| H                                                                          | 4.82625800  | -3.23043300 | -0.87437500 | C                                                                                   | 2.99257000  | 0.37263600  | -0.24960500 |
| H                                                                          | 3.37079200  | -3.79404700 | -0.03737200 | C                                                                                   | 4.42190500  | 0.88339100  | -0.29008300 |
| C                                                                          | 0.74047800  | -1.53166300 | -2.55120000 | H                                                                                   | 4.62590600  | 1.48422600  | -1.18464400 |
| H                                                                          | 0.91275900  | -1.85926700 | -3.58086700 | H                                                                                   | 4.62544600  | 1.51859100  | 0.58098200  |
| H                                                                          | -0.33549800 | -1.57151400 | -2.36120500 | C                                                                                   | 5.44350600  | -0.23622300 | -0.23017900 |
| H                                                                          | 1.07397700  | -0.49621000 | -2.45563900 | O                                                                                   | 5.28145200  | -1.30535800 | 0.34142900  |
| C                                                                          | 0.96525300  | -3.88659600 | -1.73077000 | O                                                                                   | 6.58638400  | 0.08675500  | -0.85733600 |
| H                                                                          | -0.12853300 | -3.90792600 | -1.69300000 | C                                                                                   | 7.66754100  | -0.88633300 | -0.79181700 |
| H                                                                          | 1.27359900  | -4.28538100 | -2.70257900 | C                                                                                   | 8.83846300  | -0.32011500 | -1.56669000 |
| H                                                                          | 1.34657900  | -4.54576300 | -0.94817700 | H                                                                                   | 7.31283800  | -1.82920000 | -1.21868800 |
| C                                                                          | 3.04174400  | 2.81066400  | -0.88682900 | H                                                                                   | 7.91715800  | -1.05799900 | 0.25968300  |
| C                                                                          | 3.50928800  | 2.61856500  | 0.61003700  | H                                                                                   | 9.66889600  | -1.03295400 | -1.53850500 |
| B                                                                          | 1.84971600  | 1.07138600  | 0.10447400  | H                                                                                   | 8.57201300  | -0.14571700 | -2.61400300 |
| O                                                                          | 2.18876800  | 1.63540300  | -1.10945100 | H                                                                                   | 9.18213600  | 0.62357300  | -1.13124200 |
| O                                                                          | 2.49066200  | 1.70689800  | 1.15044600  | C                                                                                   | 2.51291500  | -0.28922700 | -1.52939800 |
| C                                                                          | 3.50435100  | 3.88715000  | 1.45877200  | H                                                                                   | 3.31753200  | -0.87986900 | -1.99799000 |
| H                                                                          | 3.79403000  | 3.64076700  | 2.48527500  | H                                                                                   | 2.25007500  | 0.47440000  | -2.27488800 |
| H                                                                          | 4.22482700  | 4.61626400  | 1.07406200  | C                                                                                   | 1.32511000  | -1.20907800 | -1.31382500 |
| H                                                                          | 2.51821100  | 4.35589300  | 1.48908300  | C                                                                                   | 1.32841400  | -2.23414600 | -0.36875000 |
| C                                                                          | 4.85288400  | 1.89538200  | 0.75479700  | H                                                                                   | 0.60684700  | -1.27885400 | -2.12818800 |
| H                                                                          | 5.68186000  | 2.51926900  | 0.40732100  | H                                                                                   | 0.66835000  | -3.08691900 | -0.48389800 |
| H                                                                          | 5.02365900  | 1.66613800  | 1.81155000  | H                                                                                   | 2.18443700  | -2.37176700 | 0.28679000  |
| H                                                                          | 4.86587700  | 0.95474300  | 0.19800500  | C                                                                                   | 1.91491500  | 2.44406300  | 2.38540300  |
| C                                                                          | 2.16711700  | 4.04618700  | -1.11651300 | H                                                                                   | 0.82375000  | 2.42540600  | 2.29124000  |
| H                                                                          | 2.74942700  | 4.96774200  | -1.02201400 | H                                                                                   | 2.17134900  | 2.79077200  | 3.39192700  |
| H                                                                          | 1.75657600  | 4.01043200  | -2.13056300 | H                                                                                   | 2.27451800  | 3.19231900  | 1.66607600  |
| H                                                                          | 1.33159200  | 4.09449000  | -0.41332100 | C                                                                                   | 3.33057800  | 0.48332100  | 2.97808400  |
| C                                                                          | 4.16314100  | 2.77237600  | -1.92240800 | Pd                                                                                  | 0.22409200  | -0.54832000 | 0.46134500  |
| H                                                                          | 3.73920100  | 2.88197000  | -2.92588500 | O                                                                                   | -0.78728600 | 0.27160100  | 2.25501000  |
| H                                                                          | 4.86775800  | 3.59557200  | -1.76592400 | C                                                                                   | -1.88601700 | 0.71361000  | 2.57271100  |
| H                                                                          | 4.71409700  | 1.83012200  | -1.88935100 | O                                                                                   | -2.76345300 | 1.23627900  | 1.70636700  |
| <b>6</b>                                                                   |             |             |             | C                                                                                   | -2.39826300 | 0.69772900  | 3.97689800  |
| Thermal correction to Enthalpy in MeOH at B3LYP/BSI level=0.724399         |             |             |             | H                                                                                   | -1.66283700 | 0.25056000  | 4.64472300  |
| Thermal correction to Gibbs Free Energy in MeOH at B3LYP/BSI level=0.59967 |             |             |             | H                                                                                   | -2.62774000 | 1.72054600  | 4.29274100  |

|   |             |             |             |
|---|-------------|-------------|-------------|
| H | -3.33267300 | 0.12730500  | 4.00995200  |
| H | 3.54577700  | 0.93102100  | 3.94654900  |
| H | 3.79185300  | -0.47881900 | 2.76853300  |
| C | -1.58795500 | 2.79651500  | -1.36613800 |
| C | -3.15233300 | 3.02533500  | -1.35782300 |
| B | -2.53114400 | 1.82102200  | 0.46177400  |
| O | -1.33802200 | 2.28925600  | 0.00268700  |
| O | -3.60499400 | 2.05724000  | -0.34342500 |
| C | -3.86055800 | 2.70535600  | -2.66813800 |
| H | -4.93713300 | 2.86189500  | -2.54885600 |
| H | -3.51120600 | 3.36911000  | -3.46498500 |
| H | -3.69750800 | 1.67121800  | -2.97836300 |
| C | -3.56619900 | 4.40654700  | -0.84465800 |
| H | -3.31676000 | 5.18944800  | -1.56614700 |
| H | -4.64888000 | 4.41978100  | -0.68750200 |
| H | -3.08146600 | 4.64354300  | 0.10732300  |
| C | -1.13974400 | 1.70121900  | -2.33345100 |
| H | -1.26929900 | 2.02090200  | -3.37141200 |
| H | -0.07764900 | 1.49564600  | -2.17590000 |
| H | -1.69824700 | 0.77397600  | -2.17985100 |
| C | -0.75163900 | 4.05572700  | -1.55615700 |
| H | 0.31156100  | 3.79895500  | -1.51930200 |
| H | -0.95452500 | 4.50466700  | -2.53351200 |
| H | -0.95047000 | 4.80025400  | -0.78263600 |
| C | -2.98705200 | -3.03051300 | -1.12300600 |
| C | -3.62366600 | -2.57927700 | 0.24308300  |
| B | -1.51167800 | -1.63927100 | 0.00681300  |
| O | -1.84237500 | -2.11454200 | -1.25026400 |
| O | -2.47037800 | -1.98827300 | 0.94237800  |
| C | -4.17418500 | -3.71029500 | 1.10637700  |
| H | -4.56349800 | -3.30273900 | 2.04505600  |
| H | -4.99844800 | -4.22081400 | 0.59740500  |
| H | -3.40765900 | -4.44885100 | 1.35051500  |
| C | -4.66962500 | -1.46979000 | 0.09988200  |
| H | -5.59110900 | -1.84793100 | -0.35335300 |
| H | -4.91779300 | -1.08051800 | 1.09215100  |
| H | -4.29993500 | -0.63909600 | -0.50660600 |
| C | -2.40645800 | -4.44831000 | -1.09375100 |
| H | -3.19647700 | -5.20510100 | -1.06961700 |
| H | -1.81165900 | -4.60929700 | -1.99835500 |
| H | -1.75563300 | -4.59860400 | -0.22737000 |
| C | -3.87897200 | -2.85143600 | -2.34754500 |
| H | -3.34242400 | -3.17439600 | -3.24562600 |
| H | -4.78427800 | -3.46113700 | -2.26167400 |

|   |             |             |             |
|---|-------------|-------------|-------------|
| H | -4.17572900 | -1.80956800 | -2.48689500 |
|---|-------------|-------------|-------------|

### Bpin-OAC

Thermal correction to Enthalpy in MeOH at B3LYP/BSI level=0.248298

Thermal correction to Gibbs Free Energy in MeOH at B3LYP/BSI level=0.192772

Sum of electronic and thermal Enthalpies in MeOH at B3LYP/BSI level=-639.582982

Sum of electronic and thermal Free Energies in MeOH at B3LYP/BSI level=-639.638508

Sum of electronic Energies in MeOH at M06/BSII level =-639.6091496

Thermal correction to Enthalpy in AcOH at B3LYP/BSI level=0.248525

Thermal correction to Gibbs Free Energy in AcOH at B3LYP/BSI level=0.193083

Sum of electronic and thermal Enthalpies in AcOH at B3LYP/BSI level=-639.573348

Sum of electronic and thermal Free Energies in AcOH at B3LYP/BSI level=-639.628789

Sum of electronic Energies in AcOH at M06/BSII level =-639.599083

|   |            |            |             |
|---|------------|------------|-------------|
| O | 2.84353800 | 1.32046800 | -0.13827900 |
|---|------------|------------|-------------|

|   |            |            |             |
|---|------------|------------|-------------|
| C | 2.96289400 | 0.11758600 | -0.03229200 |
|---|------------|------------|-------------|

|   |            |             |             |
|---|------------|-------------|-------------|
| O | 1.90346100 | -0.74116700 | -0.07145100 |
|---|------------|-------------|-------------|

|   |            |             |            |
|---|------------|-------------|------------|
| C | 4.25767400 | -0.62095100 | 0.12899700 |
|---|------------|-------------|------------|

|   |            |            |            |
|---|------------|------------|------------|
| H | 5.08986000 | 0.08280000 | 0.14200800 |
|---|------------|------------|------------|

|   |            |             |            |
|---|------------|-------------|------------|
| H | 4.23989900 | -1.19758800 | 1.05958200 |
|---|------------|-------------|------------|

|   |            |             |             |
|---|------------|-------------|-------------|
| H | 4.38112800 | -1.33278400 | -0.69366900 |
|---|------------|-------------|-------------|

|   |             |            |            |
|---|-------------|------------|------------|
| C | -1.37386500 | 0.81140000 | 0.09321600 |
|---|-------------|------------|------------|

|   |             |             |             |
|---|-------------|-------------|-------------|
| C | -1.68029800 | -0.72979600 | -0.06778400 |
|---|-------------|-------------|-------------|

|   |            |             |             |
|---|------------|-------------|-------------|
| B | 0.56344100 | -0.36674800 | -0.04269500 |
|---|------------|-------------|-------------|

|   |            |            |            |
|---|------------|------------|------------|
| O | 0.06169800 | 0.81077700 | 0.42597000 |
|---|------------|------------|------------|

|   |             |             |             |
|---|-------------|-------------|-------------|
| O | -0.37104800 | -1.26547500 | -0.47144600 |
|---|-------------|-------------|-------------|

|   |             |             |             |
|---|-------------|-------------|-------------|
| C | -2.69134000 | -1.07763700 | -1.15372700 |
|---|-------------|-------------|-------------|

|   |             |             |             |
|---|-------------|-------------|-------------|
| H | -2.82209400 | -2.16333100 | -1.20091900 |
|---|-------------|-------------|-------------|

|   |             |             |             |
|---|-------------|-------------|-------------|
| H | -3.66499700 | -0.63149700 | -0.92861500 |
|---|-------------|-------------|-------------|

|   |             |             |             |
|---|-------------|-------------|-------------|
| H | -2.36743900 | -0.73055800 | -2.13714300 |
|---|-------------|-------------|-------------|

|   |             |             |            |
|---|-------------|-------------|------------|
| C | -2.04385100 | -1.42288000 | 1.24773100 |
|---|-------------|-------------|------------|

|   |             |             |            |
|---|-------------|-------------|------------|
| H | -3.04054600 | -1.13004700 | 1.59006500 |
|---|-------------|-------------|------------|

|   |             |             |            |
|---|-------------|-------------|------------|
| H | -2.04249500 | -2.50601500 | 1.09207300 |
|---|-------------|-------------|------------|

|   |             |             |            |
|---|-------------|-------------|------------|
| H | -1.32326300 | -1.19106000 | 2.03785900 |
|---|-------------|-------------|------------|

|   |             |            |             |
|---|-------------|------------|-------------|
| C | -1.51166900 | 1.60195600 | -1.21032300 |
|---|-------------|------------|-------------|

|   |             |            |             |
|---|-------------|------------|-------------|
| H | -2.56037700 | 1.71045900 | -1.50113200 |
|---|-------------|------------|-------------|

|   |             |            |             |
|---|-------------|------------|-------------|
| H | -1.09218800 | 2.60241200 | -1.06753900 |
|---|-------------|------------|-------------|

|   |             |            |             |
|---|-------------|------------|-------------|
| H | -0.97099900 | 1.12065900 | -2.03088900 |
|---|-------------|------------|-------------|

|   |             |            |            |
|---|-------------|------------|------------|
| C | -2.12129600 | 1.50701300 | 1.22433500 |
|---|-------------|------------|------------|

|   |             |            |            |
|---|-------------|------------|------------|
| H | -1.81459900 | 2.55641300 | 1.27598000 |
|---|-------------|------------|------------|

|   |             |            |            |
|---|-------------|------------|------------|
| H | -3.20044100 | 1.48137800 | 1.04320400 |
|---|-------------|------------|------------|

|   |             |            |            |
|---|-------------|------------|------------|
| H | -1.91933700 | 1.04553200 | 2.19334500 |
|---|-------------|------------|------------|

### 7

Thermal correction to Enthalpy in MeOH at B3LYP/BSI level=0.473939

Thermal correction to Gibbs Free Energy in MeOH at B3LYP/BSI level=0.382738

Sum of electronic and thermal Enthalpies in MeOH at B3LYP/BSI level=-1155.512845

|                                                                                     |                                                                                     |            |             |             |
|-------------------------------------------------------------------------------------|-------------------------------------------------------------------------------------|------------|-------------|-------------|
| Sum of electronic and thermal Free Energies in MeOH at B3LYP/BSI level=-1155.604046 | C                                                                                   | 5.59651400 | -0.04415900 | -1.40744700 |
| Sum of electronic Energies in MeOH at M06/BSII level =-1156.6939153                 | H                                                                                   | 5.97381400 | 0.98254800  | -1.35716100 |
| Thermal correction to Enthalpy in AcOH at B3LYP/BSI level=0.474434                  | H                                                                                   | 6.45638500 | -0.71931400 | -1.34478900 |
| Thermal correction to Gibbs Free Energy in AcOH at B3LYP/BSI level=0.383647         | H                                                                                   | 5.11832100 | -0.18038700 | -2.37998700 |
| Sum of electronic and thermal Enthalpies in AcOH at B3LYP/BSI level=-1155.499097    | C                                                                                   | 5.27052700 | 0.11636500  | 1.07417900  |
| Sum of electronic and thermal Free Energies in AcOH at B3LYP/BSI level=-1155.589883 | H                                                                                   | 6.19568100 | -0.43678900 | 1.26271000  |
| Sum of electronic Energies in AcOH at M06/BSII level =-1156.6806303                 | H                                                                                   | 5.51572400 | 1.18271300  | 1.03998800  |
| C                                                                                   | H                                                                                   | 4.59027800 | -0.04749700 | 1.91519400  |
| C                                                                                   | C                                                                                   | 3.81812900 | -2.35837900 | -1.61075000 |
| C                                                                                   | H                                                                                   | 4.78309800 | -2.67506800 | -2.01816100 |
| C                                                                                   | H                                                                                   | 3.18127800 | -3.24458900 | -1.52648200 |
| H                                                                                   | H                                                                                   | 3.34962100 | -1.67054900 | -2.32080100 |
| H                                                                                   | C                                                                                   | 4.61545200 | -2.71101900 | 0.73988100  |
| C                                                                                   | H                                                                                   | 4.06534600 | -3.65754800 | 0.71734500  |
| O                                                                                   | H                                                                                   | 5.65089300 | -2.91967100 | 0.45057900  |
| O                                                                                   | H                                                                                   | 4.61073000 | -2.34261200 | 1.76824000  |
| C                                                                                   | <b>TS7</b>                                                                          |            |             |             |
| C                                                                                   | Thermal correction to Enthalpy in MeOH at B3LYP/BSI level=0.472902                  |            |             |             |
| H                                                                                   | Thermal correction to Gibbs Free Energy in MeOH at B3LYP/BSI level=0.386169         |            |             |             |
| H                                                                                   | Sum of electronic and thermal Enthalpies in MeOH at B3LYP/BSI level=-1155.50184     |            |             |             |
| H                                                                                   | Sum of electronic and thermal Free Energies in MeOH at B3LYP/BSI level=-1155.588573 |            |             |             |
| H                                                                                   | Sum of electronic Energies in MeOH at M06/BSII level =-1156.6858537                 |            |             |             |
| H                                                                                   | Thermal correction to Enthalpy in AcOH at B3LYP/BSI level=0.473492                  |            |             |             |
| C                                                                                   | Thermal correction to Gibbs Free Energy in AcOH at B3LYP/BSI level=0.386421         |            |             |             |
| H                                                                                   | Sum of electronic and thermal Enthalpies in AcOH at B3LYP/BSI level=-1155.488882    |            |             |             |
| H                                                                                   | Sum of electronic and thermal Free Energies in AcOH at B3LYP/BSI level=-1155.575953 |            |             |             |
| C                                                                                   | Sum of electronic Energies in AcOH at M06/BSII level =-1156.6728949                 |            |             |             |
| C                                                                                   | C                                                                                   | 0.44711900 | -0.27560000 | -0.24365600 |
| H                                                                                   | C                                                                                   | 0.38689800 | -1.52272800 | -1.04849900 |
| H                                                                                   | C                                                                                   | 1.44804000 | -0.00129200 | 0.63436000  |
| H                                                                                   | C                                                                                   | 2.63602200 | -0.92141100 | 0.86409900  |
| C                                                                                   | H                                                                                   | 2.85617500 | -1.03100900 | 1.93108100  |
| H                                                                                   | H                                                                                   | 2.43758500 | -1.92295500 | 0.47043500  |
| H                                                                                   | C                                                                                   | 3.89141600 | -0.44384000 | 0.15572900  |
| H                                                                                   | O                                                                                   | 3.90973600 | 0.12569500  | -0.92573900 |
| C                                                                                   | O                                                                                   | 5.00200400 | -0.76499000 | 0.83496900  |
| Pd                                                                                  | C                                                                                   | 6.27552600 | -0.43936000 | 0.20626200  |
| H                                                                                   | C                                                                                   | 7.37280600 | -0.84690300 | 1.16623000  |
| H                                                                                   | H                                                                                   | 6.29396100 | 0.63372900  | -0.00414300 |
| C                                                                                   | H                                                                                   | 6.33953700 | -0.97850200 | -0.74360200 |
| C                                                                                   | H                                                                                   | 8.34632900 | -0.61243300 | 0.72384200  |
| B                                                                                   | H                                                                                   | 7.28836900 | -0.30617300 | 2.11411500  |
| O                                                                                   | H                                                                                   | 7.34044000 | -1.92156500 | 1.37162800  |
| O                                                                                   | C                                                                                   | 1.59863300 | 1.33143800  | 1.36801700  |

|                                                                                     |             |             |             |                                                                                     |             |             |             |
|-------------------------------------------------------------------------------------|-------------|-------------|-------------|-------------------------------------------------------------------------------------|-------------|-------------|-------------|
| H                                                                                   | 2.50238600  | 1.82043500  | 0.97623600  | Sum of electronic and thermal Enthalpies in AcOH at B3LYP/BSI level=-1155.530705    |             |             |             |
| H                                                                                   | 1.80724200  | 1.13346000  | 2.43030900  | Sum of electronic and thermal Free Energies in AcOH at B3LYP/BSI level=-1155.618875 |             |             |             |
| C                                                                                   | 0.43635300  | 2.30236500  | 1.26018500  | Sum of electronic Energies in AcOH at M06/BSII level=-1156.7226855                  |             |             |             |
| C                                                                                   | 0.48421300  | 3.50154200  | 0.59400300  | C                                                                                   | 0.46117300  | 0.81372500  | -0.55698800 |
| H                                                                                   | -0.39474600 | 2.12637300  | 1.94218200  | C                                                                                   | 0.76537800  | 2.26102000  | -0.25531200 |
| H                                                                                   | -0.29933300 | 4.24364500  | 0.72043000  | C                                                                                   | 1.43414800  | -0.02583600 | -0.97032100 |
| H                                                                                   | 1.36735800  | 3.80270800  | 0.03397300  | C                                                                                   | 2.87207500  | 0.43936300  | -1.11181600 |
| C                                                                                   | 0.48818700  | -1.34365000 | -2.54485400 | H                                                                                   | 3.33690300  | 0.02515300  | -2.01431500 |
| H                                                                                   | 1.44011900  | -0.86670400 | -2.81092600 | H                                                                                   | 2.94715500  | 1.52832300  | -1.19475400 |
| H                                                                                   | 0.41949800  | -2.30038800 | -3.07173800 | C                                                                                   | 3.74185000  | 0.04647900  | 0.07005300  |
| H                                                                                   | -0.31033400 | -0.68670600 | -2.91181900 | O                                                                                   | 3.33888900  | -0.39449900 | 1.13530300  |
| C                                                                                   | 0.22357100  | -2.73707200 | -0.49404400 | O                                                                                   | 5.03898100  | 0.27050600  | -0.18771900 |
| Pd                                                                                  | -0.43449100 | 1.58345100  | -0.68551000 | C                                                                                   | 5.98219500  | -0.01684500 | 0.88445000  |
| H                                                                                   | 0.16850700  | -3.63624500 | -1.10354700 | C                                                                                   | 7.35838300  | 0.37943000  | 0.39458100  |
| H                                                                                   | 0.12901200  | -2.86647600 | 0.58083500  | H                                                                                   | 5.92345200  | -1.08373500 | 1.12020300  |
| C                                                                                   | -3.48404600 | -0.54321300 | 1.20257000  | H                                                                                   | 5.68480000  | 0.54896500  | 1.77205700  |
| C                                                                                   | -3.69184600 | -1.05051700 | -0.27978700 | H                                                                                   | 8.09561600  | 0.16579700  | 1.17522800  |
| B                                                                                   | -1.69411000 | 0.12203400  | -0.09680600 | H                                                                                   | 7.63649000  | -0.18313700 | -0.50227300 |
| O                                                                                   | -2.07479600 | -0.13030400 | 1.20885300  | H                                                                                   | 7.40227600  | 1.44877300  | 0.16526600  |
| O                                                                                   | -2.62035200 | -0.35028500 | -1.00762300 | C                                                                                   | 1.28599900  | -1.50425200 | -1.29191900 |
| C                                                                                   | -5.02153400 | -0.65399900 | -0.91678600 | H                                                                                   | 1.91074500  | -2.06262000 | -0.58065300 |
| H                                                                                   | -5.05357000 | -1.01405300 | -1.95017600 | H                                                                                   | 1.75749100  | -1.66478800 | -2.27595200 |
| H                                                                                   | -5.86057200 | -1.10687000 | -0.37864900 | C                                                                                   | -0.09131500 | -2.12004500 | -1.33421400 |
| H                                                                                   | -5.16231400 | 0.42904600  | -0.93147500 | C                                                                                   | -0.39118400 | -3.35232300 | -0.73068800 |
| C                                                                                   | -3.45229300 | -2.55018300 | -0.46506000 | H                                                                                   | -0.72050200 | -1.78320400 | -2.15914800 |
| H                                                                                   | -4.24471200 | -3.13758400 | 0.00841900  | H                                                                                   | -1.20522900 | -3.96529000 | -1.11494700 |
| H                                                                                   | -3.45229600 | -2.78366700 | -1.53455300 | H                                                                                   | 0.38040000  | -3.89217700 | -0.18157800 |
| H                                                                                   | -2.49083000 | -2.86340600 | -0.05148400 | C                                                                                   | 0.50640300  | 3.24347000  | -1.37371300 |
| C                                                                                   | -4.30402200 | 0.70413400  | 1.54921800  | H                                                                                   | -0.52422500 | 3.16069500  | -1.73851800 |
| H                                                                                   | -5.37258000 | 0.47799100  | 1.61115000  | H                                                                                   | 0.68073600  | 4.27575500  | -1.05444100 |
| H                                                                                   | -3.98165600 | 1.08374300  | 2.52397100  | H                                                                                   | 1.15597600  | 3.03235100  | -2.23319200 |
| H                                                                                   | -4.15964800 | 1.49961600  | 0.81219100  | C                                                                                   | 1.18840100  | 2.64963400  | 0.95567700  |
| C                                                                                   | -3.66849200 | -1.60700200 | 2.28104200  | Pd                                                                                  | -1.19773800 | -1.76854600 | 0.45436500  |
| H                                                                                   | -3.46142100 | -1.17267800 | 3.26434700  | H                                                                                   | 1.37552300  | 3.69781200  | 1.18095100  |
| H                                                                                   | -4.69905400 | -1.97615600 | 2.28887600  | H                                                                                   | 1.36884200  | 1.93546700  | 1.75492300  |
| H                                                                                   | -2.99632700 | -2.45543400 | 2.13644000  | C                                                                                   | -3.36533700 | 0.85977800  | -0.57340600 |
| <b>12</b>                                                                           |             |             |             | C                                                                                   | -3.00759400 | 0.92600300  | 0.96725100  |
| Thermal correction to Enthalpy in MeOH at B3LYP/BSI level=0.474826                  |             |             |             | B                                                                                   | -1.07597300 | 0.53902100  | -0.29803100 |
| Thermal correction to Gibbs Free Energy in MeOH at B3LYP/BSI level=0.387212         |             |             |             | O                                                                                   | -2.04955200 | 0.89893000  | -1.21416800 |
| Sum of electronic and thermal Enthalpies in MeOH at B3LYP/BSI level=-1155.543254    |             |             |             | O                                                                                   | -1.61466300 | 0.43980400  | 1.00390200  |
| Sum of electronic and thermal Free Energies in MeOH at B3LYP/BSI level=-1155.630868 |             |             |             | C                                                                                   | -3.84673900 | 0.02537800  | 1.86545600  |
| Sum of electronic Energies in MeOH at M06/BSII level=-1156.7355463                  |             |             |             | H                                                                                   | -3.50802300 | 0.11792600  | 2.90232200  |
| Thermal correction to Enthalpy in AcOH at B3LYP/BSI level=0.475287                  |             |             |             | H                                                                                   | -4.90123900 | 0.31669700  | 1.82918400  |
| Thermal correction to Gibbs Free Energy in AcOH at B3LYP/BSI level=0.387117         |             |             |             | H                                                                                   | -3.76363100 | -1.02461700 | 1.57029700  |

|   |             |             |             |
|---|-------------|-------------|-------------|
| C | -2.95730400 | 2.34807700  | 1.53250600  |
| H | -3.95716800 | 2.78777700  | 1.58892500  |
| H | -2.54408200 | 2.31506900  | 2.54520900  |
| H | -2.32300800 | 3.00270600  | 0.92862600  |
| C | -4.04558500 | -0.44335400 | -1.00495100 |
| H | -5.05921300 | -0.51813100 | -0.60003900 |
| H | -4.11382500 | -0.46353900 | -2.09734200 |
| H | -3.47063200 | -1.31971500 | -0.68316500 |
| C | -4.16856800 | 2.05322800  | -1.08799400 |
| H | -4.34244800 | 1.94051500  | -2.16280900 |
| H | -5.14433500 | 2.10487000  | -0.59470000 |
| H | -3.64653500 | 2.99881700  | -0.92644000 |

#### TS4

Thermal correction to Enthalpy in MeOH at B3LYP/BSI level=0.337543  
Thermal correction to Gibbs Free Energy in MeOH at B3LYP/BSI level=0.259868  
Sum of electronic and thermal Enthalpies in MeOH at B3LYP/BSI level=-972.841611  
Sum of electronic and thermal Free Energies in MeOH at B3LYP/BSI level=-972.935286  
Sum of electronic Energies in MeOH at M06/BSII level =-974.0119755  
Thermal correction to Enthalpy in AcOH at B3LYP/BSI level=0.337907  
Thermal correction to Gibbs Free Energy in AcOH at B3LYP/BSI level=0.260767  
Sum of electronic and thermal Enthalpies in AcOH at B3LYP/BSI level=-972.825507  
Sum of electronic and thermal Free Energies in AcOH at B3LYP/BSI level=-972.902647  
Sum of electronic Energies in AcOH at M06/BSII level =-973.9920109

|   |             |             |             |
|---|-------------|-------------|-------------|
| C | 0.01268000  | -1.21091800 | 0.52463000  |
| C | 0.18645000  | -0.88300500 | 1.95797400  |
| C | -1.09411800 | -1.43384600 | -0.23705700 |
| C | -2.54658800 | -1.22262700 | 0.07578600  |
| H | -3.16567900 | -1.93809400 | -0.47494800 |
| H | -2.76275300 | -1.38115300 | 1.13909500  |
| C | -3.03465300 | 0.17806000  | -0.26664500 |
| O | -2.32391600 | 1.12937000  | -0.54494800 |
| O | -4.36978500 | 0.24408600  | -0.20144500 |
| C | -4.97454500 | 1.54410600  | -0.46726900 |
| C | -6.46844700 | 1.39880600  | -0.27201800 |
| H | -4.72075100 | 1.83933500  | -1.48956600 |
| H | -4.54023000 | 2.27438600  | 0.22126600  |
| H | -6.95098600 | 2.36412700  | -0.45642500 |
| H | -6.89037100 | 0.66648300  | -0.96752700 |
| H | -6.70406000 | 1.08834900  | 0.75086000  |
| C | -0.56178200 | -2.26060800 | -1.36926900 |
| H | -0.53694600 | -1.79098800 | -2.35852300 |
| H | -1.09731100 | -3.21511100 | -1.45604300 |
| C | 0.80784500  | -2.45966000 | -0.72239400 |
| C | 2.00512100  | -1.96885900 | -1.34590600 |

|    |             |             |             |
|----|-------------|-------------|-------------|
| H  | 0.89354300  | -3.31829400 | -0.05923500 |
| H  | 2.95895100  | -2.40529600 | -1.04807800 |
| H  | 1.94026200  | -1.67574000 | -2.39510400 |
| C  | -0.65345000 | 0.23736000  | 2.53436700  |
| H  | -1.71230600 | -0.03760200 | 2.58951800  |
| H  | -0.31833900 | 0.48318300  | 3.54612400  |
| H  | -0.58708600 | 1.13800000  | 1.91556400  |
| C  | 1.08388600  | -1.55143700 | 2.70540900  |
| Pd | 1.74243800  | -0.24085200 | -0.28155400 |
| O  | 3.35722300  | 1.05774000  | -0.88294800 |
| C  | 3.01325400  | 2.05492400  | -0.14767500 |
| O  | 2.00109400  | 1.98652300  | 0.60524400  |
| C  | 3.83806400  | 3.31564700  | -0.23009300 |
| H  | 3.63940800  | 3.81369100  | -1.18608200 |
| H  | 3.58701800  | 3.99863600  | 0.58346600  |
| H  | 4.90434400  | 3.07387300  | -0.20029400 |
| H  | 1.21818300  | -1.31804200 | 3.75816100  |
| H  | 1.69370800  | -2.34995600 | 2.29297500  |

#### 8

Thermal correction to Enthalpy in MeOH at B3LYP/BSI level=0.339463  
Thermal correction to Gibbs Free Energy in MeOH at B3LYP/BSI level=0.263639  
Sum of electronic and thermal Enthalpies in MeOH at B3LYP/BSI level=-972.868399  
Sum of electronic and thermal Free Energies in MeOH at B3LYP/BSI level=-972.944223  
Sum of electronic Energies in MeOH at M06/BSII level =-974.0271525  
Thermal correction to Enthalpy in AcOH at B3LYP/BSI level=0.339926  
Thermal correction to Gibbs Free Energy in AcOH at B3LYP/BSI level=0.264442  
Sum of electronic and thermal Enthalpies in AcOH at B3LYP/BSI level=-972.853756  
Sum of electronic and thermal Free Energies in AcOH at B3LYP/BSI level=-972.929239  
Sum of electronic Energies in AcOH at M06/BSII level =-974.0097337

|   |             |             |             |
|---|-------------|-------------|-------------|
| C | 1.27408800  | -1.69312500 | 0.08965300  |
| C | 1.99375900  | -1.92581100 | 1.34537500  |
| C | -0.06312400 | -1.47867100 | -0.30018800 |
| C | -1.35411900 | -1.39443700 | 0.45333900  |
| H | -1.78084600 | -2.39992800 | 0.57079000  |
| H | -1.20588000 | -1.00326700 | 1.46524100  |
| C | -2.39501100 | -0.51937800 | -0.21860000 |
| O | -2.18026200 | 0.27402000  | -1.12166900 |
| O | -3.60064000 | -0.70920300 | 0.33013600  |
| C | -4.69445500 | 0.11331900  | -0.17210600 |
| C | -5.95337000 | -0.32073000 | 0.54715700  |
| H | -4.76954800 | -0.03419700 | -1.25306100 |
| H | -4.45239400 | 1.16284300  | 0.01966400  |
| H | -6.79675900 | 0.28032300  | 0.19237200  |
| H | -6.17700000 | -1.37406000 | 0.35045400  |

|                                                                                     |             |             |             |    |             |             |             |
|-------------------------------------------------------------------------------------|-------------|-------------|-------------|----|-------------|-------------|-------------|
| H                                                                                   | -5.86120500 | -0.17686300 | 1.62832600  | C  | 6.76748000  | 0.86728600  | -0.20285100 |
| C                                                                                   | 0.18373200  | -2.00533600 | -1.71204600 | C  | 8.11646200  | 0.94412400  | -0.88450900 |
| H                                                                                   | -0.19097300 | -1.43436700 | -2.56550400 | H  | 6.85939300  | 0.65571600  | 0.86625100  |
| H                                                                                   | -0.14952100 | -3.04721800 | -1.79317200 | H  | 6.19267500  | 1.79032300  | -0.32454900 |
| C                                                                                   | 1.70867300  | -1.90410400 | -1.38688400 | H  | 8.69973200  | 1.75613700  | -0.43859000 |
| C                                                                                   | 2.20221700  | -0.51517500 | -1.72219700 | H  | 8.67540800  | 0.01151400  | -0.75858900 |
| H                                                                                   | 2.34514700  | -2.75368800 | -1.65304300 | H  | 8.00783500  | 1.14709600  | -1.95459300 |
| H                                                                                   | 3.24818900  | -0.31848100 | -1.47299200 | C  | 3.08972300  | -3.02537800 | 0.98098800  |
| H                                                                                   | 1.92576900  | -0.12663300 | -2.70694500 | H  | 3.28164300  | -2.39112000 | 1.85319900  |
| C                                                                                   | 1.30097700  | -1.61243600 | 2.65055700  | H  | 3.74876400  | -3.90178600 | 1.02838700  |
| H                                                                                   | 0.40077400  | -2.22458100 | 2.77955100  | C  | 1.55337500  | -3.32073300 | 0.74086300  |
| H                                                                                   | 1.96522100  | -1.80460100 | 3.49748000  | C  | 0.50323600  | -2.65501300 | 1.61730600  |
| H                                                                                   | 0.98833200  | -0.56249600 | 2.68989400  | H  | 1.34238500  | -4.38590500 | 0.59163600  |
| C                                                                                   | 3.23930500  | -2.43264400 | 1.29898300  | H  | -0.07186100 | -3.33378000 | 2.25420800  |
| Pd                                                                                  | 1.06440700  | 0.47386400  | -0.34309800 | H  | 0.91220700  | -1.83164700 | 2.21075000  |
| O                                                                                   | 1.61895400  | 2.56396100  | -0.53127100 | C  | 0.74674000  | -1.03450300 | -2.38450300 |
| C                                                                                   | 0.81941500  | 2.97794100  | 0.38759700  | H  | 1.34390900  | -1.40826900 | -3.22689300 |
| O                                                                                   | 0.08005700  | 2.16664200  | 1.01649700  | H  | -0.22352800 | -0.72029400 | -2.77560000 |
| C                                                                                   | 0.78804600  | 4.45603400  | 0.68539900  | H  | 1.26362700  | -0.16588000 | -1.97178400 |
| H                                                                                   | 0.48304000  | 5.00284700  | -0.21314200 | C  | -0.55024800 | -2.91523100 | -1.29174000 |
| H                                                                                   | 0.09579500  | 4.67779000  | 1.49924300  | Pd | -0.88494300 | -1.64412600 | 0.47884900  |
| H                                                                                   | 1.79262100  | 4.79957700  | 0.95263400  | O  | -2.89655000 | 0.73894700  | 1.82711900  |
| H                                                                                   | 3.79665300  | -2.63592300 | 2.20932000  | C  | -2.34671000 | -0.01750400 | 2.66204300  |
| H                                                                                   | 3.73418800  | -2.66085800 | 0.35962500  | O  | -1.54555400 | -0.98608900 | 2.39848700  |
| <b>TS5</b>                                                                          |             |             |             | C  | -2.62117100 | 0.19711200  | 4.14162900  |
| Thermal correction to Enthalpy in MeOH at B3LYP/BSI level=0.72395                   |             |             |             | H  | -2.96535600 | -0.73532000 | 4.59999900  |
| Thermal correction to Gibbs Free Energy in MeOH at B3LYP/BSI level=0.60436          |             |             |             | H  | -1.69189200 | 0.48599600  | 4.64477400  |
| Sum of electronic and thermal Enthalpies in MeOH at B3LYP/BSI level=-1795.072927    |             |             |             | H  | -3.36791600 | 0.97905100  | 4.29084500  |
| Sum of electronic and thermal Free Energies in MeOH at B3LYP/BSI level=-1795.192517 |             |             |             | H  | -1.36180400 | -2.72944100 | -1.98544700 |
| Sum of electronic Energies in MeOH at M06/BSII level =-1796.292427                  |             |             |             | H  | -0.52172700 | -3.90271300 | -0.83882800 |
| Thermal correction to Enthalpy in AcOH at B3LYP/BSI level=0.72395                   |             |             |             | C  | 0.71171100  | 3.07182500  | 1.03171300  |
| Thermal correction to Gibbs Free Energy in AcOH at B3LYP/BSI level=0.60436          |             |             |             | C  | 0.84821400  | 3.16628800  | -0.53150800 |
| Sum of electronic and thermal Enthalpies in AcOH at B3LYP/BSI level=-1795.072927    |             |             |             | B  | -0.97003700 | 1.85641100  | 0.01780400  |
| Sum of electronic and thermal Free Energies in AcOH at B3LYP/BSI level=-1795.192517 |             |             |             | O  | -0.62890600 | 2.49721000  | 1.18825800  |
| Sum of electronic Energies in AcOH at M06/BSII level =-1796.292427                  |             |             |             | O  | -0.04428900 | 2.08879300  | -0.98217800 |
| C                                                                                   | 1.72723100  | -2.52533200 | -0.53032400 | C  | 2.24729200  | 2.90847500  | -1.08008800 |
| C                                                                                   | 0.59830400  | -2.13219000 | -1.36642300 | H  | 2.22450400  | 2.92969100  | -2.17457400 |
| C                                                                                   | 3.04408500  | -2.27719600 | -0.34457000 | H  | 2.93813100  | 3.68959500  | -0.74559200 |
| C                                                                                   | 4.12293000  | -1.59151800 | -1.11512800 | H  | 2.64533500  | 1.94228500  | -0.76453900 |
| H                                                                                   | 4.89155800  | -2.31131500 | -1.42434700 | C  | 0.28153300  | 4.46348700  | -1.11909100 |
| H                                                                                   | 3.72773600  | -1.14400800 | -2.03527300 | H  | 0.91506000  | 5.32267500  | -0.88053500 |
| C                                                                                   | 4.80703300  | -0.48179100 | -0.33765500 | H  | 0.23168100  | 4.37082500  | -2.20854100 |
| O                                                                                   | 4.31274600  | 0.12502400  | 0.60054000  | H  | -0.72874200 | 4.66156000  | -0.74894500 |
| O                                                                                   | 6.02611800  | -0.22244200 | -0.82533300 | C  | 1.68953500  | 2.08331200  | 1.67481900  |

|                                                                                     |             |             |             |    |             |             |             |
|-------------------------------------------------------------------------------------|-------------|-------------|-------------|----|-------------|-------------|-------------|
| H                                                                                   | 2.71334200  | 2.46779000  | 1.66187100  | H  | 3.74029300  | -1.11509600 | -2.02042000 |
| H                                                                                   | 1.40022500  | 1.92336500  | 2.71850800  | C  | 4.79976500  | -0.39627100 | -0.33264500 |
| H                                                                                   | 1.67734600  | 1.11573800  | 1.16574600  | O  | 4.27354500  | 0.22263200  | 0.57999100  |
| C                                                                                   | 0.74721700  | 4.40673300  | 1.76955400  | O  | 6.02426500  | -0.12486800 | -0.79940600 |
| H                                                                                   | 0.61348400  | 4.23707800  | 2.84277600  | C  | 6.73253800  | 0.98923900  | -0.18096200 |
| H                                                                                   | 1.71291000  | 4.90289400  | 1.62732100  | C  | 8.09021500  | 1.08547200  | -0.84203500 |
| H                                                                                   | -0.04330900 | 5.08143800  | 1.43346900  | H  | 6.81157000  | 0.79318900  | 0.89218900  |
| C                                                                                   | -4.41689200 | 0.82084300  | -1.43536000 | H  | 6.14051300  | 1.89810200  | -0.32403200 |
| C                                                                                   | -3.85550500 | -0.62481200 | -1.14802600 | H  | 8.65035200  | 1.91304900  | -0.39504400 |
| B                                                                                   | -2.42570200 | 0.99793700  | -0.24856900 | H  | 8.66539300  | 0.16554600  | -0.69766400 |
| O                                                                                   | -3.58851800 | 1.67685600  | -0.59654000 | H  | 7.99501600  | 1.27593700  | -1.91567800 |
| O                                                                                   | -2.46639400 | -0.32419800 | -0.74325600 | C  | 3.16707800  | -2.94805400 | 1.03756900  |
| C                                                                                   | -3.83362300 | -1.53664100 | -2.37254800 | H  | 3.33372200  | -2.27843200 | 1.88821800  |
| H                                                                                   | -3.50583400 | -2.54135000 | -2.09147800 | H  | 3.85842600  | -3.79704200 | 1.11423200  |
| H                                                                                   | -4.84264100 | -1.62842700 | -2.78762300 | C  | 1.64330100  | -3.30668700 | 0.80471900  |
| H                                                                                   | -3.17310000 | -1.16015500 | -3.15644100 | C  | 0.56421000  | -2.64339800 | 1.64757400  |
| C                                                                                   | -4.55058100 | -1.34794800 | 0.00931300  | H  | 1.47051200  | -4.38326900 | 0.69461000  |
| H                                                                                   | -5.55428600 | -1.67032300 | -0.28437200 | H  | 0.00653500  | -3.31667300 | 2.30633600  |
| H                                                                                   | -3.97411900 | -2.24319300 | 0.26623500  | H  | 0.94367100  | -1.78558900 | 2.21262500  |
| H                                                                                   | -4.62876200 | -0.72337400 | 0.89980600  | C  | 0.75952800  | -1.16104200 | -2.39660200 |
| C                                                                                   | -4.19309600 | 1.28630700  | -2.87991400 | H  | 1.38317400  | -1.54112000 | -3.21668400 |
| H                                                                                   | -4.83267400 | 0.74940100  | -3.58655400 | H  | -0.21893800 | -0.90612700 | -2.80898500 |
| H                                                                                   | -4.43330000 | 2.35207100  | -2.94784900 | H  | 1.23288600  | -0.25415500 | -2.01402300 |
| H                                                                                   | -3.15045900 | 1.15625200  | -3.18471300 | C  | -0.47849200 | -3.03586700 | -1.22292200 |
| C                                                                                   | -5.87795700 | 1.02637600  | -1.04092800 | Pd | -0.84867100 | -1.70392400 | 0.47574800  |
| H                                                                                   | -6.16898400 | 2.06146700  | -1.24760200 | O  | -3.00125600 | 0.66961000  | 1.69218900  |
| H                                                                                   | -6.53573600 | 0.37135300  | -1.62148500 | C  | -2.41860000 | -0.05025900 | 2.58237700  |
| H                                                                                   | -6.04394300 | 0.83396900  | 0.02119700  | O  | -1.52174700 | -0.90652000 | 2.36583600  |
| <b>9</b>                                                                            |             |             |             | C  | -2.87058400 | 0.18764200  | 4.00094400  |
| Thermal correction to Enthalpy in MeOH at B3LYP/BSI level=0.724593                  |             |             |             | H  | -2.55431300 | 1.18996700  | 4.31055100  |
| Thermal correction to Gibbs Free Energy in MeOH at B3LYP/BSI level=0.605704         |             |             |             | H  | -3.96303100 | 0.15912200  | 4.05029200  |
| Sum of electronic and thermal Enthalpies in MeOH at B3LYP/BSI level=-1795.077966    |             |             |             | H  | -2.44527300 | -0.55332200 | 4.67863100  |
| Sum of electronic and thermal Free Energies in MeOH at B3LYP/BSI level=-1795.205855 |             |             |             | H  | -1.29352700 | -2.90944800 | -1.92617300 |
| Sum of electronic Energies in MeOH at M06/BSII level =-1796.3024978                 |             |             |             | H  | -0.41382000 | -4.00357300 | -0.73235800 |
| Thermal correction to Enthalpy in AcOH at B3LYP/BSI level=0.725813                  |             |             |             | C  | 0.64346000  | 3.13425000  | 1.02996400  |
| Thermal correction to Gibbs Free Energy in AcOH at B3LYP/BSI level=0.610086         |             |             |             | C  | 0.67376600  | 3.10684600  | -0.54215200 |
| Sum of electronic and thermal Enthalpies in AcOH at B3LYP/BSI level=-1795.057949    |             |             |             | B  | -1.07052100 | 1.79531400  | 0.22721700  |
| Sum of electronic and thermal Free Energies in AcOH at B3LYP/BSI level=-1795.173676 |             |             |             | O  | -0.66070400 | 2.53471500  | 1.32271900  |
| Sum of electronic Energies in AcOH at M06/BSII level =-1796.2770902                 |             |             |             | O  | -0.21480000 | 1.97905600  | -0.84851600 |
| C                                                                                   | 1.79176400  | -2.54953900 | -0.49224000 | C  | 2.04235400  | 2.83848800  | -1.16006300 |
| C                                                                                   | 0.64845000  | -2.22165000 | -1.33652400 | H  | 1.95197600  | 2.78512000  | -2.24999400 |
| C                                                                                   | 3.09758600  | -2.24492400 | -0.31151100 | H  | 2.73505000  | 3.65325000  | -0.92386100 |
| C                                                                                   | 4.15219000  | -1.53741100 | -1.09584300 | H  | 2.48087700  | 1.90351900  | -0.80572600 |
| H                                                                                   | 4.94217900  | -2.23709800 | -1.39694700 | C  | 0.03694200  | 4.34312700  | -1.18808100 |



|                                                                                     |             |             |             |    |             |             |             |
|-------------------------------------------------------------------------------------|-------------|-------------|-------------|----|-------------|-------------|-------------|
| H                                                                                   | 0.66104900  | 5.23242400  | -1.05949000 | C  | 1.49028300  | -0.61740800 | -1.65349300 |
| H                                                                                   | -0.08320800 | 4.16482600  | -2.26135800 | C  | 3.75740000  | -1.75519800 | -0.94425900 |
| H                                                                                   | -0.95182500 | 4.54806600  | -0.76699300 | C  | 4.99086200  | -0.99001500 | -1.29396800 |
| C                                                                                   | 1.69789300  | 2.23290000  | 1.68063400  | H  | 5.77158800  | -1.65742300 | -1.67585100 |
| H                                                                                   | 2.70544900  | 2.64169700  | 1.56169700  | H  | 4.79231900  | -0.24999600 | -2.07885800 |
| H                                                                                   | 1.48860700  | 2.15545000  | 2.75245100  | C  | 5.55243000  | -0.22245000 | -0.10749400 |
| H                                                                                   | 1.68126500  | 1.22485400  | 1.25787400  | O  | 4.89362700  | 0.17985600  | 0.83851300  |
| C                                                                                   | 0.68159700  | 4.52580100  | 1.65561100  | O  | 6.86664600  | -0.00618900 | -0.23925900 |
| H                                                                                   | 0.63120900  | 4.44085000  | 2.74606000  | C  | 7.51442600  | 0.77085800  | 0.81075300  |
| H                                                                                   | 1.61446100  | 5.04077400  | 1.40357500  | C  | 8.98110000  | 0.88039700  | 0.45374100  |
| H                                                                                   | -0.15638100 | 5.14456500  | 1.32664700  | H  | 7.36138900  | 0.25595500  | 1.76367000  |
| C                                                                                   | -4.22934600 | 0.84311500  | -1.48691400 | H  | 7.03044800  | 1.75032400  | 0.86544400  |
| C                                                                                   | -3.78697300 | -0.62788800 | -1.15862000 | H  | 9.49936000  | 1.45260100  | 1.22999600  |
| B                                                                                   | -2.54544000 | 0.89394500  | 0.17829500  | H  | 9.44684200  | -0.10807200 | 0.38854900  |
| O                                                                                   | -3.67819900 | 1.60522200  | -0.39735000 | H  | 9.11790500  | 1.39692600  | -0.50152900 |
| O                                                                                   | -2.48022100 | -0.38865200 | -0.55003900 | C  | 3.58885800  | -3.04637600 | -0.15651900 |
| C                                                                                   | -3.63251800 | -1.52195600 | -2.38706900 | H  | 3.88541600  | -2.98081200 | 0.89609300  |
| H                                                                                   | -3.41766900 | -2.55193000 | -2.08620400 | H  | 4.04567700  | -3.94335600 | -0.59633100 |
| H                                                                                   | -4.56648800 | -1.54122200 | -2.95922400 | C  | 2.02837800  | -2.84157200 | -0.37945800 |
| H                                                                                   | -2.83375500 | -1.18009500 | -3.04928200 | C  | 1.14594800  | -2.42710400 | 0.78439900  |
| C                                                                                   | -4.70005200 | -1.32588500 | -0.13937200 | H  | 1.57082000  | -3.63688800 | -0.98095200 |
| H                                                                                   | -5.64771100 | -1.62559800 | -0.59827800 | H  | 0.52717500  | -3.23167600 | 1.20075300  |
| H                                                                                   | -4.20190700 | -2.23305000 | 0.22028500  | H  | 1.73125900  | -1.96063300 | 1.58700800  |
| H                                                                                   | -4.91915600 | -0.69124600 | 0.72172100  | C  | 1.99964600  | 0.73449500  | -2.06873400 |
| C                                                                                   | -3.61203700 | 1.37332400  | -2.79242100 | H  | 2.59010000  | 0.61731400  | -2.98758900 |
| H                                                                                   | -4.04419600 | 0.90130300  | -3.68040000 | H  | 1.18236400  | 1.42392200  | -2.28162200 |
| H                                                                                   | -3.80324700 | 2.44971400  | -2.85718000 | H  | 2.66192800  | 1.16648900  | -1.31289500 |
| H                                                                                   | -2.52827400 | 1.22500500  | -2.80847600 | C  | 0.16838600  | -1.00567400 | -1.87677000 |
| C                                                                                   | -5.74457400 | 1.05255100  | -1.51363800 | Pd | -0.18316800 | -0.79992900 | 0.28380100  |
| H                                                                                   | -5.96754000 | 2.10071600  | -1.74071400 | O  | -2.68893300 | -0.05546300 | 2.06698100  |
| H                                                                                   | -6.21690800 | 0.43612800  | -2.28614500 | C  | -1.67330700 | -0.32623000 | 2.84662500  |
| H                                                                                   | -6.20218500 | 0.81398300  | -0.55071300 | O  | -0.58024700 | -0.74619400 | 2.42612900  |
| <b>TS6</b>                                                                          |             |             |             | C  | -1.91107200 | -0.06942600 | 4.30260300  |
| Thermal correction to Enthalpy in MeOH at B3LYP/BSI level=0.722439                  |             |             |             | H  | -2.13414400 | 0.99363000  | 4.44314100  |
| Thermal correction to Gibbs Free Energy in MeOH at B3LYP/BSI level=0.601997         |             |             |             | H  | -2.78364000 | -0.63682500 | 4.64009100  |
| Sum of electronic and thermal Enthalpies in MeOH at B3LYP/BSI level=-1795.055153    |             |             |             | H  | -1.03357800 | -0.34348100 | 4.88776100  |
| Sum of electronic and thermal Free Energies in MeOH at B3LYP/BSI level=-1795.186595 |             |             |             | H  | -0.48418600 | -0.33153000 | -2.41919700 |
| Sum of electronic Energies in MeOH at M06/BSII level=-1796.2891                     |             |             |             | H  | -0.07143700 | -2.06546700 | -1.93647300 |
| Thermal correction to Enthalpy in AcOH at B3LYP/BSI level=0.723973                  |             |             |             | C  | -0.89971100 | 3.43726700  | 0.47303100  |
| Thermal correction to Gibbs Free Energy in AcOH at B3LYP/BSI level=0.606794         |             |             |             | C  | -1.46597000 | 3.25908700  | -0.98578900 |
| Sum of electronic and thermal Enthalpies in AcOH at B3LYP/BSI level=-1795.034893    |             |             |             | B  | -1.10244000 | 1.16849100  | -0.01970700 |
| Sum of electronic and thermal Free Energies in AcOH at B3LYP/BSI level=-1795.152072 |             |             |             | O  | -1.02383800 | 2.08421000  | 1.02163700  |
| Sum of electronic Energies in AcOH at M06/BSII level=-1796.2629323                  |             |             |             | O  | -1.25401800 | 1.82622100  | -1.23151900 |
| C                                                                                   | 2.42582800  | -1.60483400 | -1.14387200 | C  | -0.72857800 | 4.04362200  | -2.06799200 |

|                                                                                     |             |             |             |                                                                                    |             |             |             |
|-------------------------------------------------------------------------------------|-------------|-------------|-------------|------------------------------------------------------------------------------------|-------------|-------------|-------------|
| H                                                                                   | -1.15665500 | 3.80844900  | -3.04790900 | Sum of electronic and thermal Enthalpies in AcOH at B3LYP/BSI level=-1795.044274   |             |             |             |
| H                                                                                   | -0.83755100 | 5.12124000  | -1.90678600 | Sum of electronic and thermal Free Energies in AcOH at B3LYP/BSI level=-1795.16675 |             |             |             |
| H                                                                                   | 0.33687800  | 3.80659100  | -2.09762200 | Sum of electronic Energies in AcOH at M06/BSII level=-1796.26614694                |             |             |             |
| C                                                                                   | -2.97216700 | 3.51679300  | -1.09656500 | C                                                                                  | 2.61187300  | -1.23507000 | -1.51025400 |
| H                                                                                   | -3.20331400 | 4.57690500  | -0.95487900 | C                                                                                  | 1.81254300  | -0.04970600 | -1.80623900 |
| H                                                                                   | -3.31373500 | 3.23037700  | -2.09632500 | C                                                                                  | 3.90153600  | -1.55621900 | -1.24834600 |
| H                                                                                   | -3.53834300 | 2.93522600  | -0.36539300 | C                                                                                  | 5.21210100  | -0.83703300 | -1.25204700 |
| C                                                                                   | 0.58949800  | 3.79700500  | 0.52174600  | H                                                                                  | 6.01213900  | -1.47757600 | -1.63885800 |
| H                                                                                   | 0.76751200  | 4.81933700  | 0.17417900  | H                                                                                  | 5.17785900  | 0.05219400  | -1.89440800 |
| H                                                                                   | 0.94094400  | 3.72629400  | 1.55606300  | C                                                                                  | 5.61683800  | -0.34246900 | 0.12846700  |
| H                                                                                   | 1.18890600  | 3.11333700  | -0.08599500 | O                                                                                  | 4.83871800  | -0.04219800 | 1.02069600  |
| C                                                                                   | -1.69323800 | 4.38586600  | 1.36825100  | O                                                                                  | 6.94676000  | -0.23272000 | 0.24331100  |
| H                                                                                   | -1.25278500 | 4.39780100  | 2.37061800  | C                                                                                  | 7.45577200  | 0.30220900  | 1.50032300  |
| H                                                                                   | -1.66217200 | 5.40863100  | 0.97849700  | C                                                                                  | 8.96316000  | 0.37332500  | 1.38590400  |
| H                                                                                   | -2.73774800 | 4.08113500  | 1.46236100  | H                                                                                  | 7.13683100  | -0.35971900 | 2.31083500  |
| C                                                                                   | -4.39173700 | -0.69113400 | -0.97453200 | H                                                                                  | 7.00996500  | 1.28759900  | 1.66388900  |
| C                                                                                   | -4.00432900 | -2.09468300 | -0.36563000 | H                                                                                  | 9.37749000  | 0.76959700  | 2.31859500  |
| B                                                                                   | -2.75920200 | -0.42732400 | 0.64663200  | H                                                                                  | 9.39403900  | -0.61814600 | 1.21438100  |
| O                                                                                   | -3.79188800 | 0.23727900  | -0.01890500 | H                                                                                  | 9.26621400  | 1.03445400  | 0.56785600  |
| O                                                                                   | -2.75145200 | -1.79921700 | 0.33612400  | C                                                                                  | 3.56451000  | -2.98701400 | -0.85129200 |
| C                                                                                   | -3.73831000 | -3.19567900 | -1.38720400 | H                                                                                  | 3.75976500  | -3.22881300 | 0.20013900  |
| H                                                                                   | -3.43907200 | -4.11328900 | -0.87004200 | H                                                                                  | 4.00259700  | -3.77771200 | -1.47767000 |
| H                                                                                   | -4.64321400 | -3.41737700 | -1.96223100 | C                                                                                  | 2.05018300  | -2.58331600 | -1.12463700 |
| H                                                                                   | -2.94248400 | -2.92292300 | -2.08359500 | C                                                                                  | 1.06984800  | -2.38077000 | 0.02653100  |
| C                                                                                   | -4.99300000 | -2.58738800 | 0.69783500  | H                                                                                  | 1.60265400  | -3.15103300 | -1.95196900 |
| H                                                                                   | -5.94581000 | -2.88872900 | 0.25209300  | H                                                                                  | 0.34032200  | -3.19683400 | 0.12887500  |
| H                                                                                   | -4.56644000 | -3.45800700 | 1.20592900  | H                                                                                  | 1.61015000  | -2.28691900 | 0.98090200  |
| H                                                                                   | -5.19065800 | -1.81796800 | 1.45001600  | C                                                                                  | 2.48879500  | 1.29803100  | -1.81593800 |
| C                                                                                   | -3.77660700 | -0.43540100 | -2.35352100 | H                                                                                  | 3.18506000  | 1.33974200  | -2.66433900 |
| H                                                                                   | -4.26156600 | -1.04904500 | -3.11858100 | H                                                                                  | 1.77158000  | 2.11222800  | -1.92960400 |
| H                                                                                   | -3.91943400 | 0.61500700  | -2.62261700 | H                                                                                  | 3.07350500  | 1.45964100  | -0.90598100 |
| H                                                                                   | -2.70647700 | -0.64944400 | -2.36692800 | C                                                                                  | 0.51099100  | -0.21910000 | -2.30828800 |
| C                                                                                   | -5.89138500 | -0.40422300 | -1.01609200 | Pd                                                                                 | 0.14310800  | -0.35519800 | -0.18379200 |
| H                                                                                   | -6.06315200 | 0.59434700  | -1.43098500 | O                                                                                  | -2.61330300 | -0.26419600 | 2.31151100  |
| H                                                                                   | -6.40586200 | -1.12581100 | -1.65882400 | C                                                                                  | -1.33486600 | -0.26683200 | 2.71773700  |
| H                                                                                   | -6.34240500 | -0.43981800 | -0.02188500 | O                                                                                  | -0.37800400 | -0.42553800 | 1.96860600  |
| <b>10</b>                                                                           |             |             |             | C                                                                                  | -1.18832700 | -0.01414900 | 4.18430900  |
| Thermal correction to Enthalpy in MeOH at B3LYP/BSI level=0.724586                  |             |             |             | H                                                                                  | -1.68849900 | 0.92506200  | 4.44267500  |
| Thermal correction to Gibbs Free Energy in MeOH at B3LYP/BSI level=0.602624         |             |             |             | H                                                                                  | -1.68740500 | -0.81407600 | 4.74136400  |
| Sum of electronic and thermal Enthalpies in MeOH at B3LYP/BSI level=-1795.065373    |             |             |             | H                                                                                  | -0.13435800 | 0.03253100  | 4.45650800  |
| Sum of electronic and thermal Free Energies in MeOH at B3LYP/BSI level=-1795.205336 |             |             |             | H                                                                                  | 0.01405600  | 0.62441700  | -2.77670900 |
| Sum of electronic Energies in MeOH at M06/BSII level=-1796.2957391                  |             |             |             | H                                                                                  | 0.18778800  | -1.20090500 | -2.64688200 |
| Thermal correction to Enthalpy in AcOH at B3LYP/BSI level=0.602838                  |             |             |             | C                                                                                  | -2.42069200 | 3.17067400  | -0.37572900 |
| Thermal correction to Gibbs Free Energy in AcOH at B3LYP/BSI level=0.602838         |             |             |             | C                                                                                  | -1.02783800 | 3.87898300  | -0.21167100 |

|                                                                                  |             |             |             |                                                                                     |             |             |             |
|----------------------------------------------------------------------------------|-------------|-------------|-------------|-------------------------------------------------------------------------------------|-------------|-------------|-------------|
| B                                                                                | -0.72848900 | 1.56786700  | -0.29690900 | Sum of electronic and thermal Free Energies in MeOH at B3LYP/BSI level=-1155.601657 |             |             |             |
| O                                                                                | -2.02915400 | 1.79885800  | -0.73388400 | Sum of electronic Energies in MeOH at M06/BSII level =-1156.6873464                 |             |             |             |
| O                                                                                | -0.14373000 | 2.75329700  | 0.12669100  | Thermal correction to Enthalpy in AcOH at B3LYP/BSI level=0.475768                  |             |             |             |
| C                                                                                | -0.95016200 | 4.90365300  | 0.91624600  | Thermal correction to Gibbs Free Energy in AcOH at B3LYP/BSI level=0.38715          |             |             |             |
| H                                                                                | 0.06217500  | 5.31740900  | 0.96985700  | Sum of electronic and thermal Enthalpies in AcOH at B3LYP/BSI level=-1155.498979    |             |             |             |
| H                                                                                | -1.64094200 | 5.73393100  | 0.73549300  | Sum of electronic and thermal Free Energies in AcOH at B3LYP/BSI level=-1155.587597 |             |             |             |
| H                                                                                | -1.18588400 | 4.46227100  | 1.88709500  | Sum of electronic Energies in AcOH at M06/BSII level =-1156.6734574                 |             |             |             |
| C                                                                                | -0.48944000 | 4.48870100  | -1.51061000 | C                                                                                   | 1.91834300  | -1.53418500 | 0.64548800  |
| H                                                                                | -1.05560200 | 5.37929400  | -1.80051500 | C                                                                                   | 1.53120500  | -2.37044400 | -0.49101700 |
| H                                                                                | 0.55285200  | 4.78774800  | -1.36096500 | C                                                                                   | 3.00490700  | -0.82854800 | 1.03636800  |
| H                                                                                | -0.52484000 | 3.77314000  | -2.33729100 | C                                                                                   | 4.39807100  | -0.63631300 | 0.52967800  |
| C                                                                                | -3.22205200 | 3.07304700  | 0.92719800  | H                                                                                   | 5.12533200  | -0.70183000 | 1.34599300  |
| H                                                                                | -3.61396500 | 4.04859500  | 1.23140400  | H                                                                                   | 4.66482100  | -1.41054200 | -0.20023000 |
| H                                                                                | -4.07060500 | 2.39898500  | 0.77459900  | C                                                                                   | 4.58042500  | 0.69681000  | -0.17846900 |
| H                                                                                | -2.61581900 | 2.67305300  | 1.74494500  | O                                                                                   | 3.70868000  | 1.27506000  | -0.80840100 |
| C                                                                                | -3.30196900 | 3.72501700  | -1.49117600 | O                                                                                   | 5.83447900  | 1.15067800  | -0.06175400 |
| H                                                                                | -4.23136600 | 3.14919700  | -1.54850900 | C                                                                                   | 6.15628700  | 2.38971500  | -0.75950100 |
| H                                                                                | -3.56782400 | 4.76873500  | -1.29315300 | C                                                                                   | 7.61529000  | 2.69013100  | -0.49260700 |
| H                                                                                | -2.80985000 | 3.67202000  | -2.46470700 | H                                                                                   | 5.49850100  | 3.17876100  | -0.38369100 |
| C                                                                                | -4.82775400 | -1.50460100 | -0.23802200 | H                                                                                   | 5.95451900  | 2.24910600  | -1.82541800 |
| C                                                                                | -3.68448500 | -2.60213400 | -0.23236500 | H                                                                                   | 7.89498900  | 3.61474500  | -1.00777400 |
| B                                                                                | -3.18686200 | -0.94321600 | 1.23712300  | H                                                                                   | 7.80181900  | 2.82501200  | 0.57746700  |
| O                                                                                | -4.49122700 | -0.68928300 | 0.94150200  | H                                                                                   | 8.25772800  | 1.88485800  | -0.86262300 |
| O                                                                                | -2.59616200 | -1.92870100 | 0.50630500  | C                                                                                   | 2.32474300  | -0.23980300 | 2.25735900  |
| C                                                                                | -3.15976400 | -2.98651800 | -1.60905700 | H                                                                                   | 2.19924300  | 0.84968500  | 2.24777000  |
| H                                                                                | -2.35447400 | -3.72038800 | -1.50593500 | H                                                                                   | 2.74414000  | -0.53660500 | 3.22743600  |
| H                                                                                | -3.95538000 | -3.44481800 | -2.20480900 | C                                                                                   | 1.04207400  | -1.04204800 | 1.79588100  |
| H                                                                                | -2.77107300 | -2.12282800 | -2.15214700 | C                                                                                   | -0.16422000 | -0.20867600 | 1.36851900  |
| C                                                                                | -4.03267800 | -3.85134400 | 0.57918300  | H                                                                                   | 0.74811000  | -1.82439100 | 2.50650700  |
| H                                                                                | -4.80069300 | -4.44740500 | 0.07859600  | H                                                                                   | -0.86463000 | -0.03726800 | 2.18959000  |
| H                                                                                | -3.13550000 | -4.46897500 | 0.68382100  | H                                                                                   | 0.14637400  | 0.76243500  | 0.96728600  |
| H                                                                                | -4.38905300 | -3.59467900 | 1.58133400  | C                                                                                   | 2.30022900  | -2.23918000 | -1.78311500 |
| C                                                                                | -4.78369100 | -0.56731700 | -1.44547900 | H                                                                                   | 3.29353800  | -2.69415400 | -1.68083300 |
| H                                                                                | -5.06112600 | -1.09232300 | -2.36380600 | H                                                                                   | 1.78538500  | -2.74510300 | -2.60467900 |
| H                                                                                | -5.50213500 | 0.24373400  | -1.29091200 | H                                                                                   | 2.45592600  | -1.18898500 | -2.05013000 |
| H                                                                                | -3.79485900 | -0.12199100 | -1.57796300 | C                                                                                   | 0.49123100  | -3.23808900 | -0.36432600 |
| C                                                                                | -6.23817400 | -2.05049000 | -0.04256200 | Pd                                                                                  | -1.04173000 | -1.20388700 | -0.19459900 |
| H                                                                                | -6.95231100 | -1.22128100 | -0.02384900 | H                                                                                   | 0.18011100  | -3.86255700 | -1.19783700 |
| H                                                                                | -6.51184000 | -2.71016200 | -0.87187100 | H                                                                                   | 0.03432400  | -3.44284300 | 0.60161100  |
| H                                                                                | -6.33656900 | -2.60665700 | 0.89200600  | C                                                                                   | -4.07147100 | 1.79588100  | 0.27726300  |
| <b>11</b>                                                                        |             |             |             | C                                                                                   | -4.81061700 | 0.64411800  | -0.49735900 |
| Thermal correction to Enthalpy in MeOH at B3LYP/BSI level=0.475142               |             |             |             | B                                                                                   | -2.62013300 | 0.02757100  | -0.05917900 |
| Thermal correction to Gibbs Free Energy in MeOH at B3LYP/BSI level=0.385987      |             |             |             | O                                                                                   | -2.85801400 | 1.11980500  | 0.75368100  |
| Sum of electronic and thermal Enthalpies in MeOH at B3LYP/BSI level=-1155.512501 |             |             |             | O                                                                                   | -3.68801400 | -0.21036500 | -0.91402000 |

|   |             |             |             |
|---|-------------|-------------|-------------|
| C | -5.56863700 | 1.08075600  | -1.74705600 |
| H | -6.01185900 | 0.20570400  | -2.23367800 |
| H | -6.38210600 | 1.76623400  | -1.48750500 |
| H | -4.91540900 | 1.57507100  | -2.46941900 |
| C | -5.70917900 | -0.21629300 | 0.39682800  |
| H | -6.60674400 | 0.32842200  | 0.70518200  |
| H | -6.02632500 | -1.10368300 | -0.16011600 |
| H | -5.17938500 | -0.54906100 | 1.29440400  |
| C | -3.60721300 | 2.94247600  | -0.62684800 |
| H | -4.45036500 | 3.54853800  | -0.97179700 |
| H | -2.93271400 | 3.59278500  | -0.06102300 |
| H | -3.06548600 | 2.56949500  | -1.50107800 |
| C | -4.81600000 | 2.34805600  | 1.48927800  |
| H | -4.20602800 | 3.11498000  | 1.97754500  |
| H | -5.75902700 | 2.81426900  | 1.18586000  |
| H | -5.03440000 | 1.57027000  | 2.22441700  |

### TS8

Thermal correction to Enthalpy in MeOH at B3LYP/BSI level=0.473443

Thermal correction to Gibbs Free Energy in MeOH at B3LYP/BSI level=0.38662

Sum of electronic and thermal Enthalpies in MeOH at B3LYP/BSI level=-1155.499119

Sum of electronic and thermal Free Energies in MeOH at B3LYP/BSI level=-1155.585942

Sum of electronic Energies in MeOH at M06/BSII level =-1156.6865829

Thermal correction to Enthalpy in AcOH at B3LYP/BSI level=0.473984

Thermal correction to Gibbs Free Energy in AcOH at B3LYP/BSI level=0.387669

Sum of electronic and thermal Enthalpies in AcOH at B3LYP/BSI level=-1155.485888

Sum of electronic and thermal Free Energies in AcOH at B3LYP/BSI level=-1155.572204

Sum of electronic Energies in AcOH at M06/BSII level =-1156.6731081

|   |             |             |             |
|---|-------------|-------------|-------------|
| C | -1.54120500 | 0.87374100  | 0.97358200  |
| C | -1.43302300 | 2.21978700  | 0.39746800  |
| C | -2.55048000 | 0.01126400  | 1.24004100  |
| C | -4.04232300 | 0.05843300  | 1.16780900  |
| H | -4.49341700 | -0.37622200 | 2.06749900  |
| H | -4.41070400 | 1.08906500  | 1.10160200  |
| C | -4.59546600 | -0.68016100 | -0.04051500 |
| O | -3.95878600 | -0.96236200 | -1.04338500 |
| O | -5.89578800 | -0.96297500 | 0.11405000  |
| C | -6.56304000 | -1.62579100 | -0.99924700 |
| C | -8.02660500 | -1.75780300 | -0.63592400 |
| H | -6.08960200 | -2.60017400 | -1.15291400 |
| H | -6.41625100 | -1.02409500 | -1.90075100 |
| H | -8.55644700 | -2.26467000 | -1.44891700 |
| H | -8.15472700 | -2.34795500 | 0.27697400  |
| H | -8.48672500 | -0.77579700 | -0.48714400 |
| C | -1.63644100 | -1.11524900 | 1.67854600  |

|    |             |             |             |
|----|-------------|-------------|-------------|
| H  | -1.65737900 | -2.01000800 | 1.04389600  |
| H  | -1.73024000 | -1.42800100 | 2.72702700  |
| C  | -0.44705600 | -0.12840700 | 1.35630300  |
| C  | 0.48566400  | -0.56249200 | 0.21214500  |
| H  | 0.13281600  | 0.14161800  | 2.24717200  |
| H  | 1.03939600  | -1.44579100 | 0.55993300  |
| H  | -0.09293300 | -0.91624500 | -0.64971800 |
| C  | -2.53958800 | 2.68854500  | -0.51982100 |
| H  | -3.44033800 | 2.92900300  | 0.05915400  |
| H  | -2.24753600 | 3.59151300  | -1.06377300 |
| H  | -2.81966100 | 1.91321600  | -1.24029900 |
| C  | -0.37827200 | 3.02941500  | 0.69960400  |
| Pd | 1.03496600  | 1.39024300  | -0.54602600 |
| H  | -0.31830600 | 4.03328800  | 0.28587400  |
| H  | 0.32336100  | 2.78268100  | 1.49344200  |
| C  | 4.31529600  | -1.14701900 | -0.83707400 |
| C  | 4.31001400  | -0.95087200 | 0.72349300  |
| B  | 2.34669100  | -0.11139700 | -0.18637800 |
| O  | 2.91190200  | -0.91223300 | -1.18196100 |
| O  | 3.20619500  | -0.00326800 | 0.90904500  |
| C  | 5.57746100  | -0.33130800 | 1.30470200  |
| H  | 5.46769300  | -0.21229700 | 2.38761100  |
| H  | 6.44328200  | -0.97712200 | 1.12541100  |
| H  | 5.78346300  | 0.65180300  | 0.87556100  |
| C  | 3.93976200  | -2.22200600 | 1.49622300  |
| H  | 4.74915600  | -2.95807400 | 1.46955500  |
| H  | 3.75213800  | -1.96352300 | 2.54323700  |
| H  | 3.03664000  | -2.69152700 | 1.09493800  |
| C  | 5.14163000  | -0.08942100 | -1.57929400 |
| H  | 6.21514700  | -0.23894800 | -1.42994000 |
| H  | 4.93615900  | -0.16265800 | -2.65195600 |
| H  | 4.88254700  | 0.92241200  | -1.25308800 |
| C  | 4.69970600  | -2.54444200 | -1.31585900 |
| H  | 4.65235600  | -2.58584100 | -2.40903300 |
| H  | 5.72432200  | -2.78975900 | -1.01748100 |
| H  | 4.02951000  | -3.31068100 | -0.91989700 |

### 13

Thermal correction to Enthalpy in MeOH at B3LYP/BSI level=0.475202

Thermal correction to Gibbs Free Energy in MeOH at B3LYP/BSI level=0.38792

Sum of electronic and thermal Enthalpies in MeOH at B3LYP/BSI level=-1155.542511

Sum of electronic and thermal Free Energies in MeOH at B3LYP/BSI level=-1155.629793

Sum of electronic Energies in MeOH at M06/BSII level =-1156.7356772

Thermal correction to Enthalpy in AcOH at B3LYP/BSI level=0.475609

Thermal correction to Gibbs Free Energy in AcOH at B3LYP/BSI level=0.388184

|                                                                                     |             |             |             |             |             |             |             |
|-------------------------------------------------------------------------------------|-------------|-------------|-------------|-------------|-------------|-------------|-------------|
| Sum of electronic and thermal Enthalpies in AcOH at B3LYP/BSI level=-1155.530371    | C           | -4.74539800 | -2.18858800 | -0.66639400 |             |             |             |
| Sum of electronic and thermal Free Energies in AcOH at B3LYP/BSI level=-1155.617795 | H           | -5.75710600 | -2.26998500 | -0.25819600 |             |             |             |
| Sum of electronic Energies in AcOH at M06/BSII level =-1156.7228896                 | H           | -4.80173100 | -2.35024900 | -1.74732300 |             |             |             |
| C                                                                                   | 1.18043100  | 0.19871300  | -1.24862500 | H           | -4.13218300 | -2.98649200 | -0.23693900 |
| C                                                                                   | 0.71094800  | 1.55765400  | -0.95033800 | C           | -3.74243000 | 0.90667600  | 1.53160500  |
| C                                                                                   | 2.39420000  | -0.39977300 | -1.35259400 | H           | -4.74658800 | 1.34091400  | 1.54846500  |
| C                                                                                   | 3.82479100  | 0.01388700  | -1.20040000 | H           | -3.31984400 | 0.99328200  | 2.53694500  |
| H                                                                                   | 4.45195000  | -0.46952500 | -1.95706400 | H           | -3.13905100 | 1.52389400  | 0.83960900  |
| H                                                                                   | 3.95045100  | 1.09505400  | -1.33418500 | C           | -4.58775400 | -1.36799900 | 2.12097500  |
| C                                                                                   | 4.39900000  | -0.30330100 | 0.17180100  | H           | -4.23074100 | -1.16293200 | 3.13537700  |
| O                                                                                   | 3.75544400  | -0.34665300 | 1.20887600  | H           | -5.64247400 | -1.07888000 | 2.07253200  |
| O                                                                                   | 5.72499600  | -0.49050300 | 0.11976600  | H           | -4.51473000 | -2.44343100 | 1.94744200  |
| C                                                                                   | 6.40697500  | -0.73055800 | 1.38514100  |             |             |             |             |
| C                                                                                   | 7.88186600  | -0.87853900 | 1.08035200  |             |             |             |             |
| H                                                                                   | 5.98814100  | -1.63397700 | 1.83824800  |             |             |             |             |
| H                                                                                   | 6.20796300  | 0.11382300  | 2.05163100  |             |             |             |             |
| H                                                                                   | 8.42948800  | -1.05529200 | 2.01162400  |             |             |             |             |
| H                                                                                   | 8.06343200  | -1.72453900 | 0.40990400  |             |             |             |             |
| H                                                                                   | 8.28038200  | 0.02894500  | 0.61571100  |             |             |             |             |
| C                                                                                   | 1.82784400  | -1.75568300 | -1.72013700 |             |             |             |             |
| H                                                                                   | 2.02327400  | -2.56952100 | -1.00933700 |             |             |             |             |
| H                                                                                   | 2.07561700  | -2.11168000 | -2.72917900 |             |             |             |             |
| C                                                                                   | 0.41288100  | -1.09236300 | -1.56491500 |             |             |             |             |
| C                                                                                   | -0.44481800 | -1.69253800 | -0.43874900 |             |             |             |             |
| H                                                                                   | -0.15415200 | -1.06146000 | -2.50456200 |             |             |             |             |
| H                                                                                   | -0.66024000 | -2.74259100 | -0.70395600 |             |             |             |             |
| H                                                                                   | 0.15454900  | -1.74005000 | 0.48042100  |             |             |             |             |
| C                                                                                   | 1.73325100  | 2.55800200  | -0.43735300 |             |             |             |             |
| H                                                                                   | 2.44824200  | 2.82132900  | -1.22900100 |             |             |             |             |
| H                                                                                   | 1.24883100  | 3.48329300  | -0.11295900 |             |             |             |             |
| H                                                                                   | 2.30775100  | 2.15462900  | 0.40205600  |             |             |             |             |
| C                                                                                   | -0.50897400 | 2.01677900  | -1.48900500 |             |             |             |             |
| Pd                                                                                  | -0.97832900 | 1.30360100  | 0.45357600  |             |             |             |             |
| H                                                                                   | -0.68791700 | 3.08886800  | -1.56024800 |             |             |             |             |
| H                                                                                   | -1.06330900 | 1.40651000  | -2.19958000 |             |             |             |             |
| C                                                                                   | -3.76080900 | -0.56848900 | 1.11598000  |             |             |             |             |
| C                                                                                   | -4.13667600 | -0.80703700 | -0.40043300 |             |             |             |             |
| B                                                                                   | -1.85217500 | -1.04704200 | -0.11512000 |             |             |             |             |
| O                                                                                   | -2.37974300 | -1.05005900 | 1.17796300  |             |             |             |             |
| O                                                                                   | -2.83381000 | -0.80122000 | -1.06558000 |             |             |             |             |
| C                                                                                   | -5.00529200 | 0.28018100  | -1.02714000 |             |             |             |             |
| H                                                                                   | -5.19222100 | 0.04110600  | -2.07904400 |             |             |             |             |
| H                                                                                   | -5.97393700 | 0.34354600  | -0.52081700 |             |             |             |             |
| H                                                                                   | -4.52518200 | 1.26030500  | -0.98327900 |             |             |             |             |
